# Supplementary material
Source: PubMed Central journal article supplement (PMC10161735)

## Supplemental Methods

### *Laboratory measurements*

Clinical laboratory procedures were described in detail previously<sup>S1, S2</sup>. Briefly, participants were examined in the morning after an overnight fast. Urine creatinine was measured by a modified Jaffé reaction, and urinary albumin by nephelometric immunoassay. Any albumin concentrations below the detection threshold of 6.8 mg/L were set to 6.8 mg/L in the analyses.

GFR was measured by the urinary clearance of non-radioactive iothalamate<sup>S3</sup>. Diuresis was initiated by an oral water load after the bladder was emptied. A loading dose of 300 mg iothalamate plus 3 mg/kg for each 1 kg >100 kg was given intravenously, followed by a continuous infusion to maintain a constant serum concentration. After equilibration, four serum and urine samples were collected at 20-minute intervals and were frozen at  $-80^{\circ}\text{C}$  until the day of assay. Iothalamate concentrations in these samples were measured by high-performance liquid chromatography (Waters, Milford, MA).

### *RNA sequencing*

A GeneChip Human Genome series U133A and Plus 2.0 Array (Affymetrix, Santa Clara, CA) was used for gene expression profiling, and the resulting image files were obtained, processed, and normalized using quantile normalization in the Robust Multi Array Average method as implemented in the Affy package<sup>S4</sup>. We used a Bayesian method, COMBAT, for correcting batch effects in the gene expression data<sup>S5</sup>. Batch corrected log<sub>2</sub> transformed data were used for all the downstream computational analyses.

### *WGCNA Analysis*

Pairwise Pearson correlations among all the genes in the expression matrix were computed. Modules (groups) of highly interconnected genes were constructed from a topological overlap matrix and hierarchical clustering. An eigen gene, a vector that summarizes the expression of all genes in that module akin to PC1, was constructed for all the modules. The modules whose eigen genes were highly correlated were merged. After an iterative process the gene expression matrix was reduced to co-expression modules.

### *ScRNAseq cohort*

An independent group of Pima Indians was used in this analysis because scRNAseq was not available when the biopsies were performed on the 52 participants in the primary analysis described above. Since the 44 individuals whose kidney tissue was assessed by scRNAseq were recently enrolled in the study, they do not have sufficient follow-up to characterize their GFR trajectories. Mean age of this single cell cohort of Pima Indians was  $41.0 \pm 11.1$  years, diabetes duration was  $12.2 \pm 7.5$  years, GFR was  $159 \pm 58$  ml/min, and median ACR was 18 (9, 48) mg/g.

## Supplemental References

- S1. Nelson RG, Bennett PH, Beck GJ, *et al.* Development and progression of renal disease in Pima Indians with non-insulin-dependent diabetes mellitus. Diabetic Renal Disease Study Group. *N Engl J Med* 1996; **335**: 1636-1642.
- S2. Weil EJ, Fufaa G, Jones LI, *et al.* Effect of losartan on prevention and progression of early diabetic nephropathy in American Indians with type 2 diabetes. *Diabetes* 2013; **62**: 3224-3231.
- S3. Myers BD, Nelson RG, Tan M, *et al.* Progression of overt nephropathy in non-insulin-dependent diabetes. *Kidney Int* 1995; **47**: 1781-1789.
- S4. Nair V, Komorowsky CV, Weil EJ, *et al.* A molecular morphometric approach to diabetic kidney disease can link structure to function and outcome. *Kidney Int* 2018; **93**: 439-449.
- S5. Johnson WE, Li C, Rabinovic A. Adjusting batch effects in microarray expression data using empirical Bayes methods. *Biostatistics* 2007; **8**: 118-127.

**Supplemental Table S1:** Clinical and morphometric measurements comparing the participants included in the study (peak GFR at or after kidney biopsy) and those who were excluded because their peak GFR occurred < 2 years before the kidney biopsy

| Characteristic                                                            | Included (n=52) | Excluded (n=32) | p-value |
|---------------------------------------------------------------------------|-----------------|-----------------|---------|
| Male sex (%)                                                              | 10 (19.2%)      | 10 (31.3%)      | 0.21    |
| Age (years)                                                               | 44.7 ± 10.3     | 48.9 ± 9.2      | 0.07    |
| Diabetes duration (years)                                                 | 13.4 ± 4.0      | 18.6 ± 7.4      | <0.001  |
| BMI (kg/m <sup>2</sup> )                                                  | 37.1 ± 8.5      | 35.5 ± 7.8      | 0.40    |
| Systolic blood pressure (mmHg)                                            | 121 ± 8         | 122 ± 12        | 0.55    |
| Diastolic blood pressure (mmHg)                                           | 76 ± 5          | 77 ± 6          | 0.39    |
| HbA1c (%)                                                                 | 9.3 ± 2.0       | 9.1 ± 1.6       | 0.67    |
| GFR (ml/min)                                                              | 163 ± 44        | 137 ± 40        | 0.007   |
| ACR (mg/g)                                                                | 32 (14-71)      | 21 (11-71)      | 0.57    |
| RAS use (%)                                                               | 38 (73.1%)      | 27 (84.4%)      | 0.23    |
| Mean glomerular volume (10 <sup>6</sup> μm <sup>3</sup> )                 | 2.38 ± 0.72*    | 2.27 ± 0.74†    | 0.49    |
| Glomerular basement membrane width (nm)                                   | 456 ± 86        | 458 ± 93        | 0.92    |
| Mesangial fractional volume per glomerulus (%)                            | 0.25 ± 0.06     | 0.27 ± 0.06     | 0.23    |
| Cortical interstitial fractional volume (%)                               | 0.18 ± 0.04‡    | 0.19 ± 0.05†    | 0.07    |
| Glomerular filtration surface density (μm <sup>2</sup> /μm <sup>3</sup> ) | 0.11 ± 0.04     | 0.10 ± 0.03     | 0.27    |
| Foot process width (nm)                                                   | 740 (634, 1014) | 768 (575, 1000) | 0.55    |
| Glomerular podocyte fractional volume (%)                                 | 0.17 ± 0.05     | 0.14 ± 0.04     | 0.032   |
| Podocyte number density per glomerulus (10 <sup>6</sup> μm <sup>3</sup> ) | 139 ± 72        | 144 ± 90        | 0.76    |
| Fenestrated endothelium (%)                                               | 44.0 ± 19.1     | 44.4 ± 16.4     | 0.92    |

Values are means ± standard deviation or median (interquartile range).

Abbreviations: ACR = albumin:creatinine ratio; BMI = body mass index; GBM = glomerular basement membrane; GFR = glomerular filtration rate; RAS = renin angiotensin system blockers.

\*n=46, †n=31, ‡n=49

p-value for differences between groups based on *t*-test for continuous variables and chi square for categorical variables. ACR and foot process width were log transformed prior to analysis.



**Supplemental Table S2: Timing of peak measured GFR compared to timing of peak eGFR**

in relation to kidney biopsy

|                             |                          | Timing of peak eGFR    |                          |                       |
|-----------------------------|--------------------------|------------------------|--------------------------|-----------------------|
|                             |                          | >2 years before biopsy | Within 2 years of biopsy | >2 years after biopsy |
| Timing of peak measured GFR | >2 years before biopsy   | 31                     | 0                        | 1                     |
|                             | Within 2 years of biopsy | 22                     | 1                        | 3                     |
|                             | >2 years after biopsy    | 18                     | 3                        | 5                     |

Abbreviations: GFR = glomerular filtration rate directly measured with iothalamate clearance; eGFR = estimated glomerular filtration rate calculated using the CKD-epi equation ( $eGFR = 141 \times \min(Scr/k)^\alpha \times \max(Scr/k)^{-1.209} \times 0.993^{Age} \times 1.018$  (if female). For males  $k = 0.9$  and  $\alpha = -0.411$ ; for females  $k = 0.7$  and  $\alpha = -0.329$ ).

**Supplemental Table S3:** Clinical and morphometric measures at the time of biopsy for the subset of participants with gene expression data compared to those without expression data

| Characteristic                                                            | No expression data (n=23) | Expression data (n=29) | <i>p</i> -value |
|---------------------------------------------------------------------------|---------------------------|------------------------|-----------------|
| Male sex (%)                                                              | 6 (26.1%)                 | 4 (13.8%)              | 0.21            |
| Age (years)                                                               | 49.1 ± 10.8               | 41.2 ± 8.6             | 0.005           |
| Diabetes duration (years)                                                 | 15.0 ± 4.6                | 12.2 ± 2.9             | 0.016           |
| BMI (kg/m <sup>2</sup> )                                                  | 36.5 ± 6.6                | 37.5 ± 9.9             | 0.66            |
| Systolic blood pressure (mmHg)                                            | 123 ± 6                   | 119 ± 9                | 0.09            |
| Diastolic blood pressure (mmHg)                                           | 76 ± 5                    | 76 ± 5                 | 0.58            |
| HbA1c (%)                                                                 | 9.1 ± 2.0                 | 9.4 ± 2.0              | 0.63            |
| GFR (ml/min)                                                              | 160 ± 46                  | 165 ± 42               | 0.65            |
| ACR (mg/g)                                                                | 36 (11, 68)               | 31 (18, 73)            | 0.65            |
| RAS use (%)                                                               | 16 (69.6%)                | 22 (75.9%)             | 0.23            |
| Mean glomerular volume (10 <sup>6</sup> μm <sup>3</sup> )                 | 2.40 ± 0.76*              | 2.37 ± 0.70†           | 0.92            |
| Glomerular basement membrane width (nm)                                   | 460 ± 663                 | 452 ± 100              | 0.74            |
| Mesangial fractional volume per glomerulus (%)                            | 0.26 ± 0.06               | 0.25 ± 0.05            | 0.52            |
| Cortical interstitial fractional volume (%)                               | 0.18 ± 0.04‡              | 0.17 ± 0.03§           | 0.51            |
| Glomerular filtration surface density (μm <sup>2</sup> /μm <sup>3</sup> ) | 0.13 ± 0.05               | 0.10 ± 0.02            | 0.021           |
| Foot process width (nm)                                                   | 777 (696, 1030)           | 716 (564, 908)         | 0.28            |
| Glomerular podocyte fractional volume (%)                                 | 0.17 ± 0.04               | 0.16 ± 0.06            | 0.55            |
| Podocyte number density per glomerulus (10 <sup>6</sup> μm <sup>3</sup> ) | 130 ± 69                  | 145 ± 74               | 0.44            |
| Fenestrated endothelium (%)                                               | 35.8 ± 17.3               | 50.5 ± 18.2            | 0.005           |

Values are means ± standard deviation or median (interquartile range).

Abbreviations: ACR = albumin:creatinine ratio; BMI = body mass index; GBM = glomerular basement membrane; GFR = glomerular filtration rate; RAS = renin angiotensin system blockers.

\*n=21, †n=25, ‡n=22, §n=27

*p*-value for differences between groups based on t-test for continuous variables and chi square for categorical variables. ACR and foot process width were log transformed prior to analysis.

**Supplemental Table S4:** Clinical and morphometric measures at the time of biopsy by peak measured GFR group for the subset of participants with gene expression data

| Characteristic                                                            | Hyperfiltration<br>after biopsy<br>(n=15) | Hyperfiltration<br>at biopsy<br>(n=14) | <i>p</i> -value |
|---------------------------------------------------------------------------|-------------------------------------------|----------------------------------------|-----------------|
| Male sex (%)                                                              | 3 (20.0%)                                 | 1 (7.1%)                               | 0.32            |
| Age (years)                                                               | 42.7 ± 6.7                                | 39.7 ± 10.2                            | 0.36            |
| Diabetes duration (years)                                                 | 11.5 ± 2.6                                | 12.9 ± 3.1                             | 0.19            |
| BMI (kg/m <sup>2</sup> )                                                  | 36.2 ± 9.6                                | 38.9 ± 10.3                            | 0.47            |
| Systolic blood pressure (mmHg)                                            | 118 ± 9                                   | 121 ± 10                               | 0.36            |
| Diastolic blood pressure (mmHg)                                           | 75 ± 5                                    | 77 ± 4                                 | 0.09            |
| HbA1c (%)                                                                 | 8.5 ± 1.9                                 | 10.4 ± 1.6                             | 0.006           |
| GFR (ml/min)                                                              | 152 ± 36                                  | 180 ± 44                               | 0.07            |
| ACR (mg/g)                                                                | 24 (13, 42)                               | 51 (23, 77)                            | 0.05            |
| RAS use (%)                                                               | 14 (93.3%)                                | 8 (57.1%)                              | 0.035           |
| Mean glomerular volume (10 <sup>6</sup> μm <sup>3</sup> )                 | 2.13 ± 0.69*                              | 2.60 ± 0.6†                            | 0.09            |
| Glomerular basement membrane width (nm)                                   | 422 ± 93                                  | 485 ± 101                              | 0.09            |
| Mesangial fractional volume per glomerulus (%)                            | 0.23 ± 0.05                               | 0.27 ± 0.05                            | 0.06            |
| Cortical interstitial fractional volume (%)                               | 0.17 ± 0.02*                              | 0.18 ± 0.04                            | 0.41            |
| Glomerular filtration surface density (μm <sup>2</sup> /μm <sup>3</sup> ) | 0.10 ± 0.02                               | 0.10 ± 0.02                            | 0.61            |
| Foot process width (nm)                                                   | 713 (560, 908)                            | 747 (564, 916)                         | 0.96            |
| Glomerular podocyte fractional volume (%)                                 | 0.18 ± 0.07                               | 0.15 ± 0.03                            | 0.11            |
| Podocyte number density per glomerulus (10 <sup>6</sup> μm <sup>3</sup> ) | 181 ± 81                                  | 108 ± 43                               | 0.006           |
| Fenestrated endothelium (%)                                               | 51.0 ± 16.0                               | 49.8 ± 21.0                            | 0.85            |

Values are means ± standard deviation or median (interquartile range).

Abbreviations: ACR = albumin:creatinine ratio; BMI = body mass index; GBM = glomerular basement membrane; GFR = glomerular filtration rate; RAS = renin angiotensin system blockers.

\*n=13, †n=12

*p*-value for differences between groups based on t-test for continuous variables and chi square for categorical variables except for RAS use which was compared by Fisher's exact test. ACR and foot process width were log transformed prior to analysis.

**Supplemental Table S5: Complete list of genes in the three WGCNA modules where 95% genes (1240 genes) were upregulated in the HF compared to pre-HF group**

| GeneID | Symbol           | ModuleAssignment |
|--------|------------------|------------------|
| 10112  | <i>KIF20A</i>    | midnightblue     |
| 2146   | <i>EZH2</i>      | midnightblue     |
| 8838   | <i>WISP3</i>     | midnightblue     |
| 1356   | <i>CP</i>        | midnightblue     |
| 59     | <i>ACTA2</i>     | midnightblue     |
| 2305   | <i>FOXM1</i>     | midnightblue     |
| 9173   | <i>IL1RL1</i>    | midnightblue     |
| 9180   | <i>OSMR</i>      | midnightblue     |
| 79727  | <i>LIN28A</i>    | midnightblue     |
| 5118   | <i>PCOLCE</i>    | midnightblue     |
| 79908  | <i>BTNL8</i>     | midnightblue     |
| 10095  | <i>ARPC1B</i>    | midnightblue     |
| 79690  | <i>GAL3ST4</i>   | midnightblue     |
| 7153   | <i>TOP2A</i>     | midnightblue     |
| 55872  | <i>PBK</i>       | midnightblue     |
| 391020 | <i>LOC391020</i> | midnightblue     |
| 3240   | <i>HP</i>        | midnightblue     |
| 70     | <i>ACTC1</i>     | midnightblue     |
| 10633  | <i>RASL10A</i>   | midnightblue     |
| 4609   | <i>MYC</i>       | midnightblue     |
| 79850  | <i>FAM57A</i>    | midnightblue     |
| 332    | <i>BIRC5</i>     | midnightblue     |
| 6241   | <i>RRM2</i>      | midnightblue     |
| 80774  | <i>LIMD2</i>     | midnightblue     |
| 1844   | <i>DUSP2</i>     | midnightblue     |
| 11065  | <i>UBE2C</i>     | midnightblue     |
| 50619  | <i>DEF6</i>      | midnightblue     |
| 7447   | <i>VSNL1</i>     | midnightblue     |
| 79075  | <i>DSCC1</i>     | midnightblue     |
| 51514  | <i>DTL</i>       | midnightblue     |
| 253982 | <i>ASPHD1</i>    | midnightblue     |
| 57706  | <i>DENND1A</i>   | midnightblue     |
| 81930  | <i>KIF18A</i>    | midnightblue     |
| 29902  | <i>FAM216A</i>   | midnightblue     |
| 10205  | <i>MPZL2</i>     | midnightblue     |
| 12     | <i>SERPINA3</i>  | midnightblue     |

|       |                |              |
|-------|----------------|--------------|
| 9133  | <i>CCNB2</i>   | midnightblue |
| 51274 | <i>KLF3</i>    | midnightblue |
| 952   | <i>CD38</i>    | midnightblue |
| 57556 | <i>SEMA6A</i>  | midnightblue |
| 2004  | <i>ELK3</i>    | midnightblue |
| 2242  | <i>FES</i>     | midnightblue |
| 9181  | <i>ARHGEF2</i> | midnightblue |
| 4240  | <i>MFGE8</i>   | midnightblue |
| 841   | <i>CASP8</i>   | midnightblue |
| 55240 | <i>STEAP3</i>  | midnightblue |
| 55711 | <i>FAR2</i>    | midnightblue |
| 5939  | <i>RBMS2</i>   | midnightblue |
| 79955 | <i>PDZD7</i>   | midnightblue |
| 8605  | <i>PLA2G4C</i> | midnightblue |
| 995   | <i>CDC25C</i>  | midnightblue |
| 84444 | <i>DOT1L</i>   | midnightblue |
| 6362  | <i>CCL18</i>   | midnightblue |
| 27036 | <i>SIGLEC7</i> | midnightblue |
| 10785 | <i>WDR4</i>    | midnightblue |
| 4615  | <i>MYD88</i>   | midnightblue |
| 6489  | <i>ST8SIA1</i> | midnightblue |
| 6509  | <i>SLC1A4</i>  | midnightblue |
| 11254 | <i>SLC6A14</i> | midnightblue |
| 79668 | <i>PARP8</i>   | midnightblue |
| 10246 | <i>SLC17A2</i> | midnightblue |
| 4313  | <i>MMP2</i>    | midnightblue |
| 56886 | <i>UGGT1</i>   | midnightblue |
| 79683 | <i>ZDHHC14</i> | midnightblue |
| 51564 | <i>HDAC7</i>   | midnightblue |
| 3978  | <i>LIG1</i>    | midnightblue |
| 10493 | <i>VAT1</i>    | midnightblue |
| 80765 | <i>STARD5</i>  | midnightblue |
| 58189 | <i>WFDC1</i>   | midnightblue |
| 80111 | <i>C3orf36</i> | midnightblue |
| 51291 | <i>GMIP</i>    | midnightblue |
| 54498 | <i>SMOX</i>    | midnightblue |
| 27185 | <i>DISC1</i>   | midnightblue |
| 9138  | <i>ARHGEF1</i> | midnightblue |
| 1788  | <i>DNMT3A</i>  | midnightblue |
| 7052  | <i>TGM2</i>    | midnightblue |
| 3801  | <i>KIFC3</i>   | midnightblue |

|        |                 |              |
|--------|-----------------|--------------|
| 4314   | <i>MMP3</i>     | midnightblue |
| 55190  | <i>NUDT11</i>   | midnightblue |
| 81029  | <i>WNT5B</i>    | midnightblue |
| 9997   | <i>SCO2</i>     | midnightblue |
| 1949   | <i>EFNB3</i>    | midnightblue |
| 54187  | <i>NANS</i>     | midnightblue |
| 7042   | <i>TGFB2</i>    | midnightblue |
| 10799  | <i>RPP40</i>    | midnightblue |
| 7903   | <i>ST8SIA4</i>  | midnightblue |
| 3710   | <i>ITPR3</i>    | midnightblue |
| 400506 | <i>KNOP1</i>    | midnightblue |
| 7408   | <i>VASP</i>     | midnightblue |
| 8988   | <i>HSPB3</i>    | midnightblue |
| 3003   | <i>GZMK</i>     | midnightblue |
| 5155   | <i>PDGFB</i>    | midnightblue |
| 6134   | <i>RPL10</i>    | midnightblue |
| 53820  | <i>RIPPLY3</i>  | midnightblue |
| 80868  | <i>HCG4B</i>    | midnightblue |
| 51332  | <i>SPTBN5</i>   | midnightblue |
| 80256  | <i>FAM214B</i>  | midnightblue |
| 10287  | <i>RGS19</i>    | midnightblue |
| 5371   | <i>PML</i>      | midnightblue |
| 6533   | <i>SLC6A6</i>   | midnightblue |
| 6503   | <i>SLA</i>      | midnightblue |
| 9645   | <i>MICAL2</i>   | midnightblue |
| 79047  | <i>KCTD15</i>   | midnightblue |
| 57596  | <i>BEGAIN</i>   | midnightblue |
| 4066   | <i>LYL1</i>     | midnightblue |
| 1263   | <i>PLK3</i>     | midnightblue |
| 9219   | <i>MTA2</i>     | midnightblue |
| 2319   | <i>FLOT2</i>    | midnightblue |
| 1302   | <i>COL11A2</i>  | midnightblue |
| 79847  | <i>TMEM180</i>  | midnightblue |
| 2000   | <i>ELF4</i>     | midnightblue |
| 7004   | <i>TEAD4</i>    | midnightblue |
| 22839  | <i>DLGAP4</i>   | midnightblue |
| 5055   | <i>SERPINB2</i> | midnightblue |
| 23166  | <i>STAB1</i>    | midnightblue |
| 843    | <i>CASP10</i>   | midnightblue |
| 5979   | <i>RET</i>      | midnightblue |
| 11186  | <i>RASSF1</i>   | midnightblue |

|       |                 |              |
|-------|-----------------|--------------|
| 79825 | <i>EFCC1</i>    | midnightblue |
| 79879 | <i>CCDC134</i>  | midnightblue |
| 63940 | <i>GPSM3</i>    | midnightblue |
| 57172 | <i>CAMK1G</i>   | midnightblue |
| 5365  | <i>PLXNB3</i>   | midnightblue |
| 2245  | <i>FGD1</i>     | midnightblue |
| 11182 | <i>SLC2A6</i>   | midnightblue |
| 84823 | <i>LMNB2</i>    | midnightblue |
| 990   | <i>CDC6</i>     | midnightblue |
| 29781 | <i>NCAPH2</i>   | midnightblue |
| 7010  | <i>TEK</i>      | midnightblue |
| 23329 | <i>TBC1D30</i>  | midnightblue |
| 604   | <i>BCL6</i>     | midnightblue |
| 1841  | <i>DTYMK</i>    | midnightblue |
| 2077  | <i>ERF</i>      | midnightblue |
| 55320 | <i>MIS18BP1</i> | midnightblue |
| 8091  | <i>HMGA2</i>    | midnightblue |
| 639   | <i>PRDM1</i>    | midnightblue |
| 9344  | <i>TAOK2</i>    | midnightblue |
| 489   | <i>ATP2A3</i>   | midnightblue |
| 10556 | <i>RPP30</i>    | midnightblue |
| 7873  | <i>MANF</i>     | midnightblue |
| 11156 | <i>PTP4A3</i>   | midnightblue |
| 81544 | <i>GDPD5</i>    | midnightblue |
| 79905 | <i>TMC7</i>     | midnightblue |
| 4776  | <i>NFATC4</i>   | midnightblue |
| 64748 | <i>LPPR2</i>    | midnightblue |
| 28985 | <i>MCTS1</i>    | midnightblue |
| 55850 | <i>USE1</i>     | midnightblue |
| 8884  | <i>SLC5A6</i>   | midnightblue |
| 9948  | <i>WDR1</i>     | midnightblue |
| 55357 | <i>TBC1D2</i>   | midnightblue |
| 22808 | <i>MRAS</i>     | midnightblue |
| 29780 | <i>PARVB</i>    | midnightblue |
| 6929  | <i>TCF3</i>     | midnightblue |
| 50515 | <i>CHST11</i>   | midnightblue |
| 5130  | <i>PCYT1A</i>   | midnightblue |
| 79901 | <i>CYBRD1</i>   | midnightblue |
| 3603  | <i>IL16</i>     | midnightblue |
| 91300 | <i>R3HDM4</i>   | midnightblue |
| 11339 | <i>OIP5</i>     | midnightblue |

|       |                |              |
|-------|----------------|--------------|
| 920   | <i>CD4</i>     | midnightblue |
| 7857  | <i>SCG2</i>    | midnightblue |
| 10184 | <i>LHFPL2</i>  | midnightblue |
| 4058  | <i>LTK</i>     | midnightblue |
| 5916  | <i>RARG</i>    | midnightblue |
| 23351 | <i>KHNYN</i>   | midnightblue |
| 5993  | <i>RFX5</i>    | midnightblue |
| 7083  | <i>TK1</i>     | midnightblue |
| 57333 | <i>RCN3</i>    | midnightblue |
| 2331  | <i>FMOD</i>    | midnightblue |
| 79927 | <i>FAM110D</i> | midnightblue |
| 2788  | <i>GNG7</i>    | midnightblue |
| 7299  | <i>TYR</i>     | midnightblue |
| 79682 | <i>CENPU</i>   | midnightblue |
| 4858  | <i>NOVA2</i>   | midnightblue |
| 55223 | <i>TRIM62</i>  | midnightblue |
| 4899  | <i>NRF1</i>    | midnightblue |
| 309   | <i>ANXA6</i>   | midnightblue |
| 5742  | <i>PTGS1</i>   | midnightblue |
| 3111  | <i>HLA-DOA</i> | midnightblue |
| 3910  | <i>LAMA4</i>   | midnightblue |
| 25806 | <i>VAX2</i>    | midnightblue |
| 9466  | <i>IL27RA</i>  | midnightblue |
| 8310  | <i>ACOX3</i>   | midnightblue |
| 7127  | <i>TNFAIP2</i> | midnightblue |
| 1606  | <i>DGKA</i>    | midnightblue |
| 1789  | <i>DNMT3B</i>  | midnightblue |
| 5600  | <i>MAPK11</i>  | midnightblue |
| 5675  | <i>PSG6</i>    | midnightblue |
| 100   | <i>ADA</i>     | midnightblue |
| 393   | <i>ARHGAP4</i> | midnightblue |
| 56548 | <i>CHST7</i>   | midnightblue |
| 26508 | <i>HEYL</i>    | midnightblue |
| 141   | <i>ADPRH</i>   | midnightblue |
| 2494  | <i>NR5A2</i>   | midnightblue |
| 8038  | <i>ADAM12</i>  | midnightblue |
| 408   | <i>ARRB1</i>   | midnightblue |
| 90379 | <i>DCAF15</i>  | midnightblue |
| 55188 | <i>RIC8B</i>   | midnightblue |
| 83448 | <i>PUS7L</i>   | midnightblue |
| 8874  | <i>ARHGEF7</i> | midnightblue |



|        |                 |              |
|--------|-----------------|--------------|
| 57118  | <i>CAMK1D</i>   | midnightblue |
| 863    | <i>CBFA2T3</i>  | midnightblue |
| 79159  | <i>NOL12</i>    | midnightblue |
| 29109  | <i>FHOD1</i>    | midnightblue |
| 51559  | <i>NT5DC3</i>   | midnightblue |
| 1183   | <i>CLCN4</i>    | midnightblue |
| 11169  | <i>WDHD1</i>    | midnightblue |
| 5271   | <i>SERPINB8</i> | midnightblue |
| 50488  | <i>MINK1</i>    | midnightblue |
| 23452  | <i>ANGPTL2</i>  | midnightblue |
| 6574   | <i>SLC20A1</i>  | midnightblue |
| 83729  | <i>INHBE</i>    | midnightblue |
| 4741   | <i>NEFM</i>     | midnightblue |
| 8882   | <i>ZPR1</i>     | midnightblue |
| 56882  | <i>CDC42SE1</i> | midnightblue |
| 9013   | <i>TAF1C</i>    | midnightblue |
| 84617  | <i>TUBB6</i>    | midnightblue |
| 3455   | <i>IFNAR2</i>   | midnightblue |
| 1445   | <i>CSK</i>      | midnightblue |
| 3574   | <i>IL7</i>      | midnightblue |
| 8940   | <i>TOP3B</i>    | midnightblue |
| 8515   | <i>ITGA10</i>   | midnightblue |
| 22846  | <i>VASH1</i>    | midnightblue |
| 9057   | <i>SLC7A6</i>   | midnightblue |
| 11230  | <i>PRAF2</i>    | midnightblue |
| 51755  | <i>CDK12</i>    | midnightblue |
| 7040   | <i>TGFB1</i>    | midnightblue |
| 3227   | <i>HOXC11</i>   | midnightblue |
| 10046  | <i>MAMLD1</i>   | midnightblue |
| 4828   | <i>NMB</i>      | midnightblue |
| 23604  | <i>DAPK2</i>    | midnightblue |
| 8751   | <i>ADAM15</i>   | midnightblue |
| 399664 | <i>MEX3D</i>    | midnightblue |
| 4650   | <i>MYO9B</i>    | midnightblue |
| 5423   | <i>POLB</i>     | midnightblue |
| 1774   | <i>DNASE1L1</i> | midnightblue |
| 26097  | <i>CHTOP</i>    | midnightblue |
| 114899 | <i>C1QTNF3</i>  | midnightblue |
| 11064  | <i>CNTRL</i>    | midnightblue |
| 4093   | <i>SMAD9</i>    | midnightblue |
| 54908  | <i>SPDL1</i>    | midnightblue |

|       |                  |              |
|-------|------------------|--------------|
| 2035  | <i>EPB41</i>     | midnightblue |
| 3191  | <i>HNRNPL</i>    | midnightblue |
| 602   | <i>BCL3</i>      | midnightblue |
| 79838 | <i>TMC5</i>      | midnightblue |
| 6103  | <i>RPGR</i>      | midnightblue |
| 983   | <i>CDK1</i>      | midnightblue |
| 29094 | <i>LGALS1</i>    | midnightblue |
| 10533 | <i>ATG7</i>      | midnightblue |
| 2275  | <i>FHL3</i>      | midnightblue |
| 10750 | <i>GRAP</i>      | midnightblue |
| 4957  | <i>ODF2</i>      | midnightblue |
| 9928  | <i>KIF14</i>     | midnightblue |
| 865   | <i>CBFB</i>      | midnightblue |
| 7450  | <i>VWF</i>       | midnightblue |
| 11165 | <i>NUDT3</i>     | midnightblue |
| 577   | <i>ADGRB3</i>    | midnightblue |
| 55117 | <i>SLC6A15</i>   | midnightblue |
| 79778 | <i>MICALL2</i>   | midnightblue |
| 9020  | <i>MAP3K14</i>   | midnightblue |
| 79870 | <i>BAALC</i>     | midnightblue |
| 81605 | <i>URM1</i>      | midnightblue |
| 6491  | <i>STIL</i>      | midnightblue |
| 2717  | <i>GLA</i>       | midnightblue |
| 775   | <i>CACNA1C</i>   | midnightblue |
| 55621 | <i>TRMT1</i>     | midnightblue |
| 79899 | <i>PRR5L</i>     | midnightblue |
| 64761 | <i>PARP12</i>    | midnightblue |
| 54840 | <i>APTX</i>      | midnightblue |
| 10195 | <i>ALG3</i>      | midnightblue |
| 65012 | <i>SLC26A10</i>  | midnightblue |
| 85377 | <i>MICALL1</i>   | midnightblue |
| 23180 | <i>RFTN1</i>     | midnightblue |
| 80169 | <i>CTC1</i>      | midnightblue |
| 10460 | <i>TACC3</i>     | midnightblue |
| 84722 | <i>PSRC1</i>     | midnightblue |
| 55966 | <i>AJAP1</i>     | midnightblue |
| 8795  | <i>TNFRSF10B</i> | midnightblue |
| 3339  | <i>HSPG2</i>     | midnightblue |
| 54478 | <i>FAM64A</i>    | midnightblue |
| 949   | <i>SCARB1</i>    | midnightblue |
| 10312 | <i>TCIRG1</i>    | midnightblue |

|       |                  |              |
|-------|------------------|--------------|
| 2634  | <i>GBP2</i>      | midnightblue |
| 23467 | <i>NPTXR</i>     | midnightblue |
| 3832  | <i>KIF11</i>     | midnightblue |
| 9363  | <i>RAB33A</i>    | midnightblue |
| 6659  | <i>SOX4</i>      | midnightblue |
| 4815  | <i>NINJ2</i>     | midnightblue |
| 25802 | <i>LMOD1</i>     | midnightblue |
| 57099 | <i>AVEN</i>      | midnightblue |
| 25796 | <i>PGLS</i>      | midnightblue |
| 10535 | <i>RNASEH2A</i>  | midnightblue |
| 8450  | <i>CUL4B</i>     | midnightblue |
| 3592  | <i>IL12A</i>     | midnightblue |
| 51067 | <i>YARS2</i>     | midnightblue |
| 54674 | <i>LRRN3</i>     | midnightblue |
| 26032 | <i>SUSD5</i>     | midnightblue |
| 53346 | <i>TM6SF1</i>    | midnightblue |
| 1259  | <i>CNGA1</i>     | midnightblue |
| 11013 | <i>TMSB15A</i>   | midnightblue |
| 9263  | <i>STK17A</i>    | midnightblue |
| 55143 | <i>CDCA8</i>     | midnightblue |
| 4900  | <i>NRGN</i>      | midnightblue |
| 27351 | <i>DESI1</i>     | midnightblue |
| 3460  | <i>IFNGR2</i>    | midnightblue |
| 4057  | <i>LTF</i>       | midnightblue |
| 5026  | <i>P2RX5</i>     | midnightblue |
| 578   | <i>BAK1</i>      | midnightblue |
| 1663  | <i>DDX11</i>     | midnightblue |
| 29015 | <i>SLC43A3</i>   | midnightblue |
| 4794  | <i>NFKBIE</i>    | midnightblue |
| 9134  | <i>CCNE2</i>     | midnightblue |
| 313   | <i>AOAH</i>      | midnightblue |
| 5873  | <i>RAB27A</i>    | midnightblue |
| 8349  | <i>HIST2H2BE</i> | midnightblue |
| 3620  | <i>IDO1</i>      | midnightblue |
| 10643 | <i>IGF2BP3</i>   | midnightblue |
| 1290  | <i>COL5A2</i>    | midnightblue |
| 8821  | <i>INPP4B</i>    | midnightblue |
| 22943 | <i>DKK1</i>      | midnightblue |
| 7941  | <i>PLA2G7</i>    | midnightblue |
| 10801 | <i>SEPTIN9</i>   | midnightblue |
| 28442 | <i>IGHV3-23</i>  | red          |

|       |                 |     |
|-------|-----------------|-----|
| 81831 | <i>NETO2</i>    | red |
| 6876  | <i>TAGLN</i>    | red |
| 929   | <i>CD14</i>     | red |
| 9314  | <i>KLF4</i>     | red |
| 57016 | <i>AKR1B10</i>  | red |
| 51299 | <i>NRN1</i>     | red |
| 7805  | <i>LAPTM5</i>   | red |
| 3059  | <i>HCLS1</i>    | red |
| 7852  | <i>CXCR4</i>    | red |
| 55340 | <i>GIMAP5</i>   | red |
| 54541 | <i>DDIT4</i>    | red |
| 6578  | <i>SLCO2A1</i>  | red |
| 1901  | <i>S1PR1</i>    | red |
| 3122  | <i>HLA-DRA</i>  | red |
| 8692  | <i>HYAL2</i>    | red |
| 2167  | <i>FABP4</i>    | red |
| 5328  | <i>PLAU</i>     | red |
| 5552  | <i>SRGN</i>     | red |
| 8322  | <i>FZD4</i>     | red |
| 1051  | <i>CEBPB</i>    | red |
| 8516  | <i>ITGA8</i>    | red |
| 4629  | <i>MYH11</i>    | red |
| 51296 | <i>SLC15A3</i>  | red |
| 355   | <i>FAS</i>      | red |
| 3428  | <i>IFI16</i>    | red |
| 6376  | <i>CX3CL1</i>   | red |
| 390   | <i>RND3</i>     | red |
| 4811  | <i>NID1</i>     | red |
| 54517 | <i>PUS7</i>     | red |
| 595   | <i>CCND1</i>    | red |
| 11067 | <i>C10orf10</i> | red |
| 3185  | <i>HNRNPF</i>   | red |
| 8291  | <i>DYSF</i>     | red |
| 185   | <i>AGTR1</i>    | red |
| 3115  | <i>HLA-DPB1</i> | red |
| 6507  | <i>SLC1A3</i>   | red |
| 26207 | <i>PITPNC1</i>  | red |
| 8875  | <i>VNN2</i>     | red |
| 972   | <i>CD74</i>     | red |
| 51705 | <i>EMCN</i>     | red |
| 8503  | <i>PIK3R3</i>   | red |

|        |                 |     |
|--------|-----------------|-----|
| 54453  | <i>RIN2</i>     | red |
| 6035   | <i>RNASE1</i>   | red |
| 79652  | <i>TMEM204</i>  | red |
| 2995   | <i>GYPC</i>     | red |
| 3384   | <i>ICAM2</i>    | red |
| 3119   | <i>HLA-DQB1</i> | red |
| 834    | <i>CASP1</i>    | red |
| 27122  | <i>DKK3</i>     | red |
| 26251  | <i>KCNG2</i>    | red |
| 11138  | <i>TBC1D8</i>   | red |
| 109    | <i>ADCY3</i>    | red |
| 8743   | <i>TNFSF10</i>  | red |
| 3123   | <i>HLA-DRB1</i> | red |
| 3429   | <i>IFI27</i>    | red |
| 7088   | <i>TLE1</i>     | red |
| 4145   | <i>MATK</i>     | red |
| 2013   | <i>EMP2</i>     | red |
| 23643  | <i>LY96</i>     | red |
| 6926   | <i>TBX3</i>     | red |
| 10536  | <i>P3H3</i>     | red |
| 23208  | <i>SYT11</i>    | red |
| 8835   | <i>SOCS2</i>    | red |
| 27303  | <i>RBMS3</i>    | red |
| 2687   | <i>GGT5</i>     | red |
| 221395 | <i>ADGRF5</i>   | red |
| 129080 | <i>EMID1</i>    | red |
| 28232  | <i>SLCO3A1</i>  | red |
| 64061  | <i>TSPYL2</i>   | red |
| 55843  | <i>ARHGAP15</i> | red |
| 947    | <i>CD34</i>     | red |
| 3182   | <i>HNRNPAB</i>  | red |
| 79812  | <i>MMRN2</i>    | red |
| 2050   | <i>EPHB4</i>    | red |
| 11007  | <i>CCDC85B</i>  | red |
| 80310  | <i>PDGFD</i>    | red |
| 581    | <i>BAX</i>      | red |
| 3397   | <i>ID1</i>      | red |
| 80723  | <i>SLC35G2</i>  | red |
| 27065  | <i>NSG1</i>     | red |
| 2040   | <i>STOM</i>     | red |
| 25960  | <i>ADGRA2</i>   | red |

|        |                  |     |
|--------|------------------|-----|
| 1293   | <i>COL6A3</i>    | red |
| 8446   | <i>DUSP11</i>    | red |
| 6939   | <i>TCF15</i>     | red |
| 80177  | <i>MYCT1</i>     | red |
| 10875  | <i>FGL2</i>      | red |
| 4052   | <i>LTBP1</i>     | red |
| 2313   | <i>FLI1</i>      | red |
| 5175   | <i>PECAM1</i>    | red |
| 4242   | <i>MFNG</i>      | red |
| 3554   | <i>IL1R1</i>     | red |
| 10019  | <i>SH2B3</i>     | red |
| 79172  | <i>CENPO</i>     | red |
| 3128   | <i>HLA-DRB6</i>  | red |
| 54922  | <i>RASIP1</i>    | red |
| 80833  | <i>APOL3</i>     | red |
| 25992  | <i>SNED1</i>     | red |
| 55303  | <i>GIMAP4</i>    | red |
| 8573   | <i>CASK</i>      | red |
| 2014   | <i>EMP3</i>      | red |
| 5915   | <i>RARB</i>      | red |
| 64174  | <i>DPEP2</i>     | red |
| 5613   | <i>PRKX</i>      | red |
| 27190  | <i>IL17B</i>     | red |
| 55691  | <i>FRMD4A</i>    | red |
| 6300   | <i>MAPK12</i>    | red |
| 1193   | <i>CLIC2</i>     | red |
| 347544 | <i>RPL18AP16</i> | red |
| 10580  | <i>SORBS1</i>    | red |
| 3488   | <i>IGFBP5</i>    | red |
| 9771   | <i>RAPGEF5</i>   | red |
| 5327   | <i>PLAT</i>      | red |
| 1071   | <i>CETP</i>      | red |
| 367    | <i>AR</i>        | red |
| 2702   | <i>GJA5</i>      | red |
| 9448   | <i>MAP4K4</i>    | red |
| 3398   | <i>ID2</i>       | red |
| 6236   | <i>RRAD</i>      | red |
| 8543   | <i>LMO4</i>      | red |
| 9590   | <i>AKAP12</i>    | red |
| 51002  | <i>TPRKB</i>     | red |
| 284403 | <i>WDR62</i>     | red |

|        |                 |     |
|--------|-----------------|-----|
| 1393   | <i>CRHBP</i>    | red |
| 22845  | <i>DOLK</i>     | red |
| 6672   | <i>SP100</i>    | red |
| 2828   | <i>GPR4</i>     | red |
| 8805   | <i>TRIM24</i>   | red |
| 55196  | <i>KIAA1551</i> | red |
| 26578  | <i>OSTF1</i>    | red |
| 9767   | <i>JADE3</i>    | red |
| 54538  | <i>ROBO4</i>    | red |
| 3430   | <i>IFI35</i>    | red |
| 54863  | <i>TOR4A</i>    | red |
| 22918  | <i>CD93</i>     | red |
| 474344 | <i>GIMAP6</i>   | red |
| 874    | <i>CBR3</i>     | red |
| 2114   | <i>ETS2</i>     | red |
| 871    | <i>SERPINH1</i> | red |
| 30850  | <i>CDR2L</i>    | red |
| 51192  | <i>CKLF</i>     | red |
| 1305   | <i>COL13A1</i>  | red |
| 1030   | <i>CDKN2B</i>   | red |
| 51474  | <i>LIMA1</i>    | red |
| 2324   | <i>FLT4</i>     | red |
| 9899   | <i>SV2B</i>     | red |
| 6403   | <i>SELP</i>     | red |
| 9844   | <i>ELMO1</i>    | red |
| 10231  | <i>RCAN2</i>    | red |
| 51703  | <i>ACSL5</i>    | red |
| 8536   | <i>CAMK1</i>    | red |
| 9580   | <i>SOX13</i>    | red |
| 23261  | <i>CAMTA1</i>   | red |
| 64129  | <i>TINAGL1</i>  | red |
| 4256   | <i>MGP</i>      | red |
| 23597  | <i>ACOT9</i>    | red |
| 26052  | <i>DNM3</i>     | red |
| 104    | <i>ADARB1</i>   | red |
| 23063  | <i>WAPAL</i>    | red |
| 57198  | <i>ATP8B2</i>   | red |
| 22900  | <i>CARD8</i>    | red |
| 5287   | <i>PIK3C2B</i>  | red |
| 79974  | <i>CPED1</i>    | red |
| 9535   | <i>GMFG</i>     | red |

|       |                 |     |
|-------|-----------------|-----|
| 8436  | <i>SDPR</i>     | red |
| 5583  | <i>PRKCH</i>    | red |
| 3937  | <i>LCP2</i>     | red |
| 6197  | <i>RPS6KA3</i>  | red |
| 8125  | <i>ANP32A</i>   | red |
| 5967  | <i>REG1A</i>    | red |
| 3459  | <i>IFNGR1</i>   | red |
| 53826 | <i>FXVD6</i>    | red |
| 27292 | <i>DIMT1</i>    | red |
| 50807 | <i>ASAP1</i>    | red |
| 5899  | <i>RALB</i>     | red |
| 10365 | <i>KLF2</i>     | red |
| 397   | <i>ARHGDIB</i>  | red |
| 9537  | <i>TP53I11</i>  | red |
| 9938  | <i>ARHGAP25</i> | red |
| 54910 | <i>SEMA4C</i>   | red |
| 3714  | <i>JAG2</i>     | red |
| 3215  | <i>HOXB5</i>    | red |
| 56901 | <i>NDUFA4L2</i> | red |
| 1965  | <i>EIF2S1</i>   | red |
| 2294  | <i>FOXF1</i>    | red |
| 2887  | <i>GRB10</i>    | red |
| 11322 | <i>TMC6</i>     | red |
| 11177 | <i>BAZ1A</i>    | red |
| 2824  | <i>GPM6B</i>    | red |
| 29108 | <i>PYCARD</i>   | red |
| 9976  | <i>CLEC2B</i>   | red |
| 2157  | <i>F8</i>       | red |
| 10567 | <i>RABAC1</i>   | red |
| 64411 | <i>ARAP3</i>    | red |
| 65108 | <i>MARCKSL1</i> | red |
| 4212  | <i>MEIS2</i>    | red |
| 3725  | <i>JUN</i>      | red |
| 5228  | <i>PGF</i>      | red |
| 1009  | <i>CDH11</i>    | red |
| 22861 | <i>NLRP1</i>    | red |
| 9510  | <i>ADAMTS1</i>  | red |
| 79630 | <i>C1orf54</i>  | red |
| 79005 | <i>SCNM1</i>    | red |
| 8829  | <i>NRP1</i>     | red |
| 4893  | <i>NRAS</i>     | red |



|        |                 |     |
|--------|-----------------|-----|
| 1535   | <i>CYBA</i>     | red |
| 10161  | <i>LPAR6</i>    | red |
| 51393  | <i>TRPV2</i>    | red |
| 10384  | <i>BTN3A3</i>   | red |
| 7126   | <i>TNFAIP1</i>  | red |
| 4147   | <i>MATN2</i>    | red |
| 2247   | <i>FGF2</i>     | red |
| 57523  | <i>NYNRIN</i>   | red |
| 2037   | <i>EPB41L2</i>  | red |
| 9124   | <i>PDLIM1</i>   | red |
| 55577  | <i>NAGK</i>     | red |
| 4855   | <i>NOTCH4</i>   | red |
| 958    | <i>CD40</i>     | red |
| 3109   | <i>HLA-DMB</i>  | red |
| 10954  | <i>PDIA5</i>    | red |
| 4149   | <i>MAX</i>      | red |
| 2523   | <i>FUT1</i>     | red |
| 51465  | <i>UBE2J1</i>   | red |
| 26112  | <i>CCDC69</i>   | red |
| 6591   | <i>SNAI2</i>    | red |
| 2876   | <i>GPX1</i>     | red |
| 9337   | <i>CNOT8</i>    | red |
| 7322   | <i>UBE2D2</i>   | red |
| 92822  | <i>ZNF276</i>   | red |
| 3481   | <i>IGF2</i>     | red |
| 2113   | <i>ETS1</i>     | red |
| 2117   | <i>ETV3</i>     | red |
| 23076  | <i>RRP1B</i>    | red |
| 7099   | <i>TLR4</i>     | red |
| 442175 | <i>RPLP2P1</i>  | red |
| 7075   | <i>TIE1</i>     | red |
| 5836   | <i>PYGL</i>     | red |
| 9710   | <i>KIAA0355</i> | red |
| 2621   | <i>GAS6</i>     | red |
| 10212  | <i>DDX39A</i>   | red |
| 10491  | <i>CRTAP</i>    | red |
| 8563   | <i>THOC5</i>    | red |
| 4851   | <i>NOTCH1</i>   | red |
| 4065   | <i>LY75</i>     | red |
| 7293   | <i>TNFRSF4</i>  | red |
| 3113   | <i>HLA-DPA1</i> | red |

|        |                |     |
|--------|----------------|-----|
| 51499  | <i>TRIAP1</i>  | red |
| 7089   | <i>TLE2</i>    | red |
| 10203  | <i>CALCRL</i>  | red |
| 22903  | <i>BTBD3</i>   | red |
| 57048  | <i>PLSCR3</i>  | red |
| 3628   | <i>INPP1</i>   | red |
| 7102   | <i>TSPAN7</i>  | red |
| 3108   | <i>HLA-DMA</i> | red |
| 8541   | <i>PPFIA3</i>  | red |
| 10528  | <i>NOP56</i>   | red |
| 5797   | <i>PTPRM</i>   | red |
| 3383   | <i>ICAM1</i>   | red |
| 51155  | <i>HN1</i>     | red |
| 2791   | <i>GNG11</i>   | red |
| 94     | <i>ACVRL1</i>  | red |
| 6256   | <i>RXRA</i>    | red |
| 3678   | <i>ITGA5</i>   | red |
| 10634  | <i>GAS2L1</i>  | red |
| 56936  | <i>CCDC177</i> | red |
| 9034   | <i>CCRL2</i>   | red |
| 10280  | <i>SIGMAR1</i> | red |
| 5728   | <i>PTEN</i>    | red |
| 6397   | <i>SEC14L1</i> | red |
| 3601   | <i>IL15RA</i>  | red |
| 219654 | <i>ZCCHC24</i> | red |
| 2683   | <i>B4GALT1</i> | red |
| 6793   | <i>STK10</i>   | red |
| 1396   | <i>CRIP1</i>   | red |
| 135    | <i>ADORA2A</i> | red |
| 26277  | <i>TINF2</i>   | red |
| 3566   | <i>IL4R</i>    | red |
| 23462  | <i>HEY1</i>    | red |
| 11259  | <i>FILIP1L</i> | red |
| 2624   | <i>GATA2</i>   | red |
| 7090   | <i>TLE3</i>    | red |
| 57228  | <i>SMAGP</i>   | red |
| 51278  | <i>IER5</i>    | red |
| 2615   | <i>LRRC32</i>  | red |
| 10266  | <i>RAMP2</i>   | red |
| 4208   | <i>MEF2C</i>   | red |
| 3399   | <i>ID3</i>     | red |

|        |                   |     |
|--------|-------------------|-----|
| 974    | <i>CD79B</i>      | red |
| 4651   | <i>MYO10</i>      | red |
| 7123   | <i>CLEC3B</i>     | red |
| 23333  | <i>DPY19L1</i>    | red |
| 9630   | <i>GNA14</i>      | red |
| 55885  | <i>LMO3</i>       | red |
| 5156   | <i>PDGFRA</i>     | red |
| 4056   | <i>LTC4S</i>      | red |
| 4071   | <i>TM4SF1</i>     | red |
| 51763  | <i>INPP5K</i>     | red |
| 55790  | <i>CSGALNACT1</i> | red |
| 4170   | <i>MCL1</i>       | red |
| 9754   | <i>STARD8</i>     | red |
| 493    | <i>ATP2B4</i>     | red |
| 6525   | <i>SMTN</i>       | red |
| 9555   | <i>H2AFY</i>      | red |
| 634    | <i>CEACAM1</i>    | red |
| 7433   | <i>VIPR1</i>      | red |
| 2078   | <i>ERG</i>        | red |
| 4301   | <i>MLLT4</i>      | red |
| 79677  | <i>SMC6</i>       | red |
| 4363   | <i>ABCC1</i>      | red |
| 9760   | <i>TOX</i>        | red |
| 9886   | <i>RHOBTB1</i>    | red |
| 55813  | <i>UTP6</i>       | red |
| 51100  | <i>SH3GLB1</i>    | red |
| 10003  | <i>NAALAD2</i>    | red |
| 7329   | <i>UBE2I</i>      | red |
| 10410  | <i>IFITM3</i>     | red |
| 6886   | <i>TAL1</i>       | red |
| 5912   | <i>RAP2B</i>      | red |
| 6405   | <i>SEMA3F</i>     | red |
| 391132 | <i>LOC391132</i>  | red |
| 5799   | <i>PTPRN2</i>     | red |
| 404672 | <i>GTF2H5</i>     | red |
| 953    | <i>ENTPD1</i>     | red |
| 6624   | <i>FSCN1</i>      | red |
| 4846   | <i>NOS3</i>       | red |
| 58494  | <i>JAM2</i>       | red |
| 51118  | <i>UTP11L</i>     | red |
| 5896   | <i>RAG1</i>       | red |

|        |                 |     |
|--------|-----------------|-----|
| 8642   | <i>DCHS1</i>    | red |
| 57608  | <i>KIAA1462</i> | red |
| 81577  | <i>GFOD2</i>    | red |
| 7637   | <i>ZNF84</i>    | red |
| 29095  | <i>ORMDL2</i>   | red |
| 9781   | <i>RNF144A</i>  | red |
| 9638   | <i>FEZ1</i>     | red |
| 83442  | <i>SH3BGRL3</i> | red |
| 3992   | <i>FADS1</i>    | red |
| 4330   | <i>MN1</i>      | red |
| 8890   | <i>EIF2B4</i>   | red |
| 3726   | <i>JUNB</i>     | red |
| 57513  | <i>CASKIN2</i>  | red |
| 4258   | <i>MGST2</i>    | red |
| 7453   | <i>WARS</i>     | red |
| 63895  | <i>PIEZO2</i>   | red |
| 60673  | <i>ATG101</i>   | red |
| 9647   | <i>PPM1F</i>    | red |
| 8487   | <i>GEMIN2</i>   | red |
| 6890   | <i>TAP1</i>     | red |
| 55795  | <i>PCID2</i>    | red |
| 9079   | <i>LDB2</i>     | red |
| 55107  | <i>ANO1</i>     | red |
| 7048   | <i>TGFBR2</i>   | red |
| 3270   | <i>HRC</i>      | red |
| 22899  | <i>ARHGEF15</i> | red |
| 3382   | <i>ICA1</i>     | red |
| 965    | <i>CD58</i>     | red |
| 753    | <i>LDLRAD4</i>  | red |
| 8496   | <i>PPFIBP1</i>  | red |
| 442171 | <i>RPL10P2</i>  | red |
| 9644   | <i>SH3PXD2A</i> | red |
| 640    | <i>BLK</i>      | red |
| 28960  | <i>DCPS</i>     | red |
| 2091   | <i>FBL</i>      | red |
| 57157  | <i>PHTF2</i>    | red |
| 10436  | <i>EMG1</i>     | red |
| 8742   | <i>TNFSF12</i>  | red |
| 23179  | <i>RGL1</i>     | red |
| 3487   | <i>IGFBP4</i>   | red |
| 23231  | <i>SEL1L3</i>   | red |

|        |                 |     |
|--------|-----------------|-----|
| 51063  | <i>CALHM2</i>   | red |
| 51177  | <i>PLEKHO1</i>  | red |
| 7706   | <i>TRIM25</i>   | red |
| 55619  | <i>DOCK10</i>   | red |
| 81619  | <i>TSPAN14</i>  | red |
| 2487   | <i>FRZB</i>     | red |
| 56911  | <i>MAP3K7CL</i> | red |
| 2      | <i>A2M</i>      | red |
| 6940   | <i>ZNF354A</i>  | red |
| 3579   | <i>CXCR2</i>    | red |
| 57124  | <i>CD248</i>    | red |
| 51226  | <i>COPZ2</i>    | red |
| 2022   | <i>ENG</i>      | red |
| 55269  | <i>PSPC1</i>    | red |
| 256949 | <i>KANK3</i>    | red |
| 6004   | <i>RGS16</i>    | red |
| 5699   | <i>PSMB10</i>   | red |
| 55106  | <i>SLFN12</i>   | red |
| 23526  | <i>HMHA1</i>    | red |
| 5998   | <i>RGS3</i>     | red |
| 1909   | <i>EDNRA</i>    | red |
| 51634  | <i>RBMX2</i>    | red |
| 1036   | <i>CDO1</i>     | red |
| 3087   | <i>HHEX</i>     | red |
| 976    | <i>ADGRE5</i>   | red |
| 57576  | <i>KIF17</i>    | red |
| 6915   | <i>TBXA2R</i>   | red |
| 9530   | <i>BAG4</i>     | red |
| 3707   | <i>ITPKB</i>    | red |
| 1054   | <i>CEBPG</i>    | red |
| 80301  | <i>PLEKHO2</i>  | red |
| 1432   | <i>MAPK14</i>   | red |
| 6238   | <i>RRBP1</i>    | red |
| 11119  | <i>BTN3A1</i>   | red |
| 30845  | <i>EHD3</i>     | red |
| 57572  | <i>DOCK6</i>    | red |
| 5787   | <i>PTPRB</i>    | red |
| 5269   | <i>SERPINB6</i> | red |
| 1282   | <i>COL4A1</i>   | red |
| 5550   | <i>PREP</i>     | red |
| 64943  | <i>NT5DC2</i>   | red |

|       |                |     |
|-------|----------------|-----|
| 5698  | <i>PSMB9</i>   | red |
| 51285 | <i>RASL12</i>  | red |
| 7035  | <i>TFPI</i>    | red |
| 3133  | <i>HLA-E</i>   | red |
| 7056  | <i>THBD</i>    | red |
| 51294 | <i>PCDH12</i>  | red |
| 2395  | <i>FXN</i>     | red |
| 1003  | <i>CDH5</i>    | red |
| 55785 | <i>FGD6</i>    | red |
| 1235  | <i>CCR6</i>    | red |
| 10109 | <i>ARPC2</i>   | red |
| 22998 | <i>LIMCH1</i>  | red |
| 55038 | <i>CDCA4</i>   | red |
| 4854  | <i>NOTCH3</i>  | red |
| 6480  | <i>ST6GAL1</i> | red |
| 7168  | <i>TPM1</i>    | red |
| 51267 | <i>CLEC1A</i>  | red |
| 6494  | <i>SIPA1</i>   | red |
| 81848 | <i>SPRY4</i>   | red |
| 6158  | <i>RPL28</i>   | red |
| 9168  | <i>TMSB10</i>  | red |
| 4092  | <i>SMAD7</i>   | red |
| 107   | <i>ADCY1</i>   | red |
| 4487  | <i>MSX1</i>    | red |
| 55707 | <i>NECAP2</i>  | red |
| 3791  | <i>KDR</i>     | red |
| 3977  | <i>LIFR</i>    | red |
| 706   | <i>TSPO</i>    | red |
| 10631 | <i>POSTN</i>   | red |
| 23683 | <i>PRKD3</i>   | red |
| 54621 | <i>VSIG10</i>  | red |
| 1513  | <i>CTSK</i>    | red |
| 54345 | <i>SOX18</i>   | red |
| 5982  | <i>RFC2</i>    | red |
| 9459  | <i>ARHGEF6</i> | red |
| 187   | <i>APLNR</i>   | red |
| 3551  | <i>IKBKB</i>   | red |
| 912   | <i>CD1D</i>    | red |
| 25966 | <i>C2CD2</i>   | red |
| 1050  | <i>CEBPA</i>   | red |
| 1175  | <i>AP2S1</i>   | red |

|       |                 |     |
|-------|-----------------|-----|
| 5770  | <i>PTPN1</i>    | red |
| 8260  | <i>NAA10</i>    | red |
| 4690  | <i>NCK1</i>     | red |
| 1466  | <i>CSRP2</i>    | red |
| 7291  | <i>TWIST1</i>   | red |
| 10228 | <i>STX6</i>     | red |
| 64785 | <i>GINS3</i>    | red |
| 57817 | <i>HAMP</i>     | red |
| 56654 | <i>NPDC1</i>    | red |
| 9843  | <i>HEPH</i>     | red |
| 30851 | <i>TAX1BP3</i>  | red |
| 9880  | <i>ZBTB39</i>   | red |
| 83468 | <i>GLT8D2</i>   | red |
| 10241 | <i>CALCOCO2</i> | red |
| 54707 | <i>GPN2</i>     | red |
| 93349 | <i>SP140L</i>   | red |
| 3632  | <i>INPP5A</i>   | red |
| 1476  | <i>CSTB</i>     | red |
| 11118 | <i>BTN3A2</i>   | red |
| 7203  | <i>CCT3</i>     | red |
| 5928  | <i>RBBP4</i>    | red |
| 4734  | <i>NEDD4</i>    | red |
| 3750  | <i>KCND1</i>    | red |
| 10121 | <i>ACTR1A</i>   | red |
| 6883  | <i>TAF12</i>    | red |
| 1284  | <i>COL4A2</i>   | red |
| 54809 | <i>SAMD9</i>    | red |
| 389   | <i>RHOC</i>     | red |
| 9592  | <i>IER2</i>     | red |
| 3142  | <i>HLX</i>      | red |
| 55119 | <i>PRPF38B</i>  | red |
| 746   | <i>TMEM258</i>  | red |
| 54861 | <i>SNRK</i>     | red |
| 3659  | <i>IRF1</i>     | red |
| 5138  | <i>PDE2A</i>    | red |
| 55740 | <i>ENAH</i>     | red |
| 5305  | <i>PIP4K2A</i>  | red |
| 8905  | <i>AP1S2</i>    | red |
| 1012  | <i>CDH13</i>    | red |
| 5216  | <i>PFN1</i>     | red |
| 1847  | <i>DUSP5</i>    | red |

|        |                 |     |
|--------|-----------------|-----|
| 10656  | <i>KHDRBS3</i>  | red |
| 3956   | <i>LGALS1</i>   | red |
| 80025  | <i>PANK2</i>    | red |
| 5082   | <i>PDCL</i>     | red |
| 23266  | <i>ADGRL2</i>   | red |
| 55003  | <i>PAK1IP1</i>  | red |
| 9462   | <i>RASAL2</i>   | red |
| 837    | <i>CASP4</i>    | red |
| 51373  | <i>MRPS17</i>   | red |
| 10252  | <i>SPRY1</i>    | red |
| 64091  | <i>POPDC2</i>   | red |
| 1942   | <i>EFNA1</i>    | red |
| 7318   | <i>UBA7</i>     | red |
| 5696   | <i>PSMB8</i>    | red |
| 56603  | <i>CYP26B1</i>  | red |
| 2200   | <i>FBN1</i>     | red |
| 4521   | <i>NUDT1</i>    | red |
| 79720  | <i>VPS37B</i>   | red |
| 56000  | <i>NXF3</i>     | red |
| 5947   | <i>RBP1</i>     | red |
| 8459   | <i>TPST2</i>    | red |
| 7846   | <i>TUBA1A</i>   | red |
| 51162  | <i>EGFL7</i>    | red |
| 1306   | <i>COL15A1</i>  | red |
| 4296   | <i>MAP3K11</i>  | red |
| 6275   | <i>S100A4</i>   | red |
| 51690  | <i>LSM7</i>     | red |
| 116496 | <i>FAM129A</i>  | red |
| 8612   | <i>PPAP2C</i>   | red |
| 8764   | <i>TNFRSF14</i> | red |
| 65998  | <i>C11orf95</i> | red |
| 10985  | <i>GCN1L1</i>   | red |
| 10403  | <i>NDC80</i>    | red |
| 5321   | <i>PLA2G4A</i>  | red |
| 9457   | <i>FHL5</i>     | red |
| 3908   | <i>LAMA2</i>    | red |
| 23545  | <i>ATP6V0A2</i> | red |
| 2625   | <i>GATA3</i>    | red |
| 55281  | <i>TMEM140</i>  | red |
| 10769  | <i>PLK2</i>     | red |
| 2826   | <i>CCR10</i>    | red |



|        |                 |        |
|--------|-----------------|--------|
| 2669   | <i>GEM</i>      | red    |
| 8925   | <i>HERC1</i>    | red    |
| 64321  | <i>SOX17</i>    | red    |
| 283298 | <i>OLFML1</i>   | red    |
| 11000  | <i>SLC27A3</i>  | red    |
| 22913  | <i>RALY</i>     | red    |
| 23336  | <i>SYNM</i>     | red    |
| 51550  | <i>CINP</i>     | red    |
| 10234  | <i>LRRC17</i>   | red    |
| 81578  | <i>COL21A1</i>  | red    |
| 8406   | <i>SRPX</i>     | red    |
| 2620   | <i>GAS2</i>     | red    |
| 8525   | <i>DGKZ</i>     | red    |
| 5376   | <i>PMP22</i>    | red    |
| 3117   | <i>HLA-DQA1</i> | red    |
| 5414   | <i>SEPTIN4</i>  | red    |
| 1277   | <i>COL1A1</i>   | salmon |
| 9332   | <i>CD163</i>    | salmon |
| 1591   | <i>CYP24A1</i>  | salmon |
| 7058   | <i>THBS2</i>    | salmon |
| 4837   | <i>NNMT</i>     | salmon |
| 7462   | <i>LAT2</i>     | salmon |
| 55165  | <i>CEP55</i>    | salmon |
| 2219   | <i>FCN1</i>     | salmon |
| 719    | <i>C3AR1</i>    | salmon |
| 11326  | <i>VSIG4</i>    | salmon |
| 2268   | <i>FGR</i>      | salmon |
| 6351   | <i>CCL4</i>     | salmon |
| 6039   | <i>RNASE6</i>   | salmon |
| 712    | <i>C1QA</i>     | salmon |
| 4069   | <i>LYZ</i>      | salmon |
| 11151  | <i>CORO1A</i>   | salmon |
| 3553   | <i>IL1B</i>     | salmon |
| 91543  | <i>RSAD2</i>    | salmon |
| 7305   | <i>TYROBP</i>   | salmon |
| 9582   | <i>APOBEC3B</i> | salmon |
| 6347   | <i>CCL2</i>     | salmon |
| 9636   | <i>ISG15</i>    | salmon |
| 79019  | <i>CENPM</i>    | salmon |
| 64581  | <i>CLEC7A</i>   | salmon |
| 2537   | <i>IFI6</i>     | salmon |

|       |                 |        |
|-------|-----------------|--------|
| 10437 | <i>IFI30</i>    | salmon |
| 2123  | <i>EVI2A</i>    | salmon |
| 64231 | <i>MS4A6A</i>   | salmon |
| 2207  | <i>FCER1G</i>   | salmon |
| 3872  | <i>KRT17</i>    | salmon |
| 2215  | <i>FCGR3B</i>   | salmon |
| 728   | <i>C5AR1</i>    | salmon |
| 3689  | <i>ITGB2</i>    | salmon |
| 5341  | <i>PLEK</i>     | salmon |
| 9450  | <i>LY86</i>     | salmon |
| 1278  | <i>COL1A2</i>   | salmon |
| 83716 | <i>CRISPLD2</i> | salmon |
| 9235  | <i>IL32</i>     | salmon |
| 1475  | <i>CSTA</i>     | salmon |
| 53829 | <i>P2RY13</i>   | salmon |
| 7409  | <i>VAV1</i>     | salmon |
| 10874 | <i>NMU</i>      | salmon |
| 56253 | <i>CRTAM</i>    | salmon |
| 963   | <i>CD53</i>     | salmon |
| 4599  | <i>MX1</i>      | salmon |
| 695   | <i>BTK</i>      | salmon |
| 9055  | <i>PRC1</i>     | salmon |
| 5199  | <i>CFP</i>      | salmon |
| 4064  | <i>CD180</i>    | salmon |
| 64127 | <i>NOD2</i>     | salmon |
| 717   | <i>C2</i>       | salmon |
| 51316 | <i>PLAC8</i>    | salmon |
| 1959  | <i>EGR2</i>     | salmon |
| 597   | <i>BCL2A1</i>   | salmon |
| 24137 | <i>KIF4A</i>    | salmon |
| 1675  | <i>CFD</i>      | salmon |
| 1536  | <i>CYBB</i>     | salmon |
| 962   | <i>CD48</i>     | salmon |
| 9595  | <i>CYTIP</i>    | salmon |
| 55247 | <i>NEIL3</i>    | salmon |
| 57214 | <i>CEMIP</i>    | salmon |
| 3669  | <i>ISG20</i>    | salmon |
| 10993 | <i>SDS</i>      | salmon |
| 2357  | <i>FPR1</i>     | salmon |
| 7096  | <i>TLR1</i>     | salmon |
| 10346 | <i>TRIM22</i>   | salmon |

|        |                 |        |
|--------|-----------------|--------|
| 241    | <i>ALOX5AP</i>  | salmon |
| 6614   | <i>SIGLEC1</i>  | salmon |
| 409    | <i>ARRB2</i>    | salmon |
| 51311  | <i>TLR8</i>     | salmon |
| 9051   | <i>PSTPIP1</i>  | salmon |
| 4688   | <i>NCF2</i>     | salmon |
| 4938   | <i>OAS1</i>     | salmon |
| 5831   | <i>PYCR1</i>    | salmon |
| 50856  | <i>CLEC4A</i>   | salmon |
| 2335   | <i>FN1</i>      | salmon |
| 752    | <i>FMNL1</i>    | salmon |
| 79968  | <i>WDR76</i>    | salmon |
| 4600   | <i>MX2</i>      | salmon |
| 3903   | <i>LAIR1</i>    | salmon |
| 54739  | <i>XAF1</i>     | salmon |
| 7538   | <i>ZFP36</i>    | salmon |
| 6283   | <i>S100A12</i>  | salmon |
| 28231  | <i>SLCO4A1</i>  | salmon |
| 1520   | <i>CTSS</i>     | salmon |
| 2921   | <i>CXCL3</i>    | salmon |
| 4689   | <i>NCF4</i>     | salmon |
| 2205   | <i>FCER1A</i>   | salmon |
| 2650   | <i>GCNT1</i>    | salmon |
| 1164   | <i>CKS2</i>     | salmon |
| 7133   | <i>TNFRSF1B</i> | salmon |
| 4050   | <i>LTB</i>      | salmon |
| 6688   | <i>SPI1</i>     | salmon |
| 55911  | <i>APOBR</i>    | salmon |
| 284021 | <i>MILR1</i>    | salmon |
| 6402   | <i>SELL</i>     | salmon |
| 3702   | <i>ITK</i>      | salmon |
| 51284  | <i>TLR7</i>     | salmon |
| 5359   | <i>PLSCR1</i>   | salmon |
| 6648   | <i>SOD2</i>     | salmon |
| 5788   | <i>PTPRC</i>    | salmon |
| 51411  | <i>BIN2</i>     | salmon |
| 10288  | <i>LILRB2</i>   | salmon |
| 79444  | <i>BIRC7</i>    | salmon |
| 11010  | <i>GLIPR1</i>   | salmon |
| 3936   | <i>LCP1</i>     | salmon |
| 6280   | <i>S100A9</i>   | salmon |

|        |                 |        |
|--------|-----------------|--------|
| 57823  | <i>SLAMF7</i>   | salmon |
| 11314  | <i>CD300A</i>   | salmon |
| 7940   | <i>LST1</i>     | salmon |
| 10333  | <i>TLR6</i>     | salmon |
| 969    | <i>CD69</i>     | salmon |
| 6404   | <i>SELPLG</i>   | salmon |
| 9770   | <i>RASSF2</i>   | salmon |
| 4046   | <i>LSP1</i>     | salmon |
| 4542   | <i>MYO1F</i>    | salmon |
| 3665   | <i>IRF7</i>     | salmon |
| 64108  | <i>RTP4</i>     | salmon |
| 3732   | <i>CD82</i>     | salmon |
| 3684   | <i>ITGAM</i>    | salmon |
| 4038   | <i>LRP4</i>     | salmon |
| 4332   | <i>MNDA</i>     | salmon |
| 2124   | <i>EVI2B</i>    | salmon |
| 3587   | <i>IL10RA</i>   | salmon |
| 27128  | <i>CYTH4</i>    | salmon |
| 5978   | <i>REST</i>     | salmon |
| 3687   | <i>ITGAX</i>    | salmon |
| 390411 | <i>NPM1P22</i>  | salmon |
| 3055   | <i>HCK</i>      | salmon |
| 5366   | <i>PMAIP1</i>   | salmon |
| 2533   | <i>FYB</i>      | salmon |
| 915    | <i>CD3D</i>     | salmon |
| 64135  | <i>IFIH1</i>    | salmon |
| 3394   | <i>IRF8</i>     | salmon |
| 10561  | <i>IFI44</i>    | salmon |
| 970    | <i>CD70</i>     | salmon |
| 51611  | <i>DPH5</i>     | salmon |
| 6286   | <i>S100P</i>    | salmon |
| 9046   | <i>DOK2</i>     | salmon |
| 11245  | <i>GPR176</i>   | salmon |
| 8519   | <i>IFITM1</i>   | salmon |
| 55379  | <i>LRRC59</i>   | salmon |
| 2863   | <i>GPR39</i>    | salmon |
| 3965   | <i>LGALS9</i>   | salmon |
| 11262  | <i>SP140</i>    | salmon |
| 945    | <i>CD33</i>     | salmon |
| 5265   | <i>SERPINA1</i> | salmon |
| 3560   | <i>IL2RB</i>    | salmon |

|       |                 |        |
|-------|-----------------|--------|
| 5794  | <i>PTPRH</i>    | salmon |
| 1441  | <i>CSF3R</i>    | salmon |
| 7454  | <i>WAS</i>      | salmon |
| 10475 | <i>TRIM38</i>   | salmon |
| 28954 | <i>REM1</i>     | salmon |
| 3159  | <i>HMGA1</i>    | salmon |
| 6398  | <i>SECTM1</i>   | salmon |
| 3676  | <i>ITGA4</i>    | salmon |
| 55008 | <i>HERC6</i>    | salmon |
| 23092 | <i>ARHGAP26</i> | salmon |
| 9242  | <i>MSC</i>      | salmon |
| 9900  | <i>SV2A</i>     | salmon |
| 5610  | <i>EIF2AK2</i>  | salmon |
| 11219 | <i>TREX2</i>    | salmon |
| 28639 | <i>TRBC1</i>    | salmon |
| 1436  | <i>CSF1R</i>    | salmon |
| 7351  | <i>UCP2</i>     | salmon |
| 4940  | <i>OAS3</i>     | salmon |
| 5097  | <i>PCDH1</i>    | salmon |
| 899   | <i>CCNF</i>     | salmon |
| 23219 | <i>FBXO28</i>   | salmon |
| 25830 | <i>SULT4A1</i>  | salmon |
| 10261 | <i>IGSF6</i>    | salmon |
| 7456  | <i>WIPF1</i>    | salmon |
| 2253  | <i>FGF8</i>     | salmon |
| 586   | <i>BCAT1</i>    | salmon |
| 3431  | <i>SP110</i>    | salmon |
| 3437  | <i>IFIT3</i>    | salmon |
| 4074  | <i>M6PR</i>     | salmon |
| 861   | <i>RUNX1</i>    | salmon |
| 7086  | <i>TKT</i>      | salmon |
| 11027 | <i>LILRA2</i>   | salmon |
| 1871  | <i>E2F3</i>     | salmon |
| 8819  | <i>SAP30</i>    | salmon |
| 9111  | <i>NMI</i>      | salmon |
| 8698  | <i>S1PR4</i>    | salmon |
| 27087 | <i>B3GAT1</i>   | salmon |
| 57089 | <i>ENTPD7</i>   | salmon |
| 54815 | <i>GATAD2A</i>  | salmon |
| 9517  | <i>SPTLC2</i>   | salmon |
| 3779  | <i>KCNMB1</i>   | salmon |

|        |                 |        |
|--------|-----------------|--------|
| 56905  | <i>C15orf39</i> | salmon |
| 10211  | <i>FLOT1</i>    | salmon |
| 79865  | <i>TREML2</i>   | salmon |
| 7179   | <i>TPTE</i>     | salmon |
| 27023  | <i>FOXB1</i>    | salmon |
| 4067   | <i>LYN</i>      | salmon |
| 8477   | <i>GPR65</i>    | salmon |
| 79845  | <i>RNF122</i>   | salmon |
| 6891   | <i>TAP2</i>     | salmon |
| 6556   | <i>SLC11A1</i>  | salmon |
| 54974  | <i>THG1L</i>    | salmon |
| 81030  | <i>ZBP1</i>     | salmon |
| 9473   | <i>THEMIS2</i>  | salmon |
| 3068   | <i>HDGF</i>     | salmon |
| 116372 | <i>LYPD1</i>    | salmon |
| 1524   | <i>CX3CR1</i>   | salmon |
| 389856 | <i>USP27X</i>   | salmon |
| 6662   | <i>SOX9</i>     | salmon |
| 5471   | <i>PPAT</i>     | salmon |
| 64919  | <i>BCL11B</i>   | salmon |
| 729230 | <i>CCR2</i>     | salmon |
| 6274   | <i>S100A3</i>   | salmon |
| 9957   | <i>HS3ST1</i>   | salmon |
| 7124   | <i>TNF</i>      | salmon |
| 24138  | <i>IFIT5</i>    | salmon |
| 54149  | <i>C21orf91</i> | salmon |
| 10570  | <i>DPYSL4</i>   | salmon |
| 8654   | <i>PDE5A</i>    | salmon |
| 3071   | <i>NCKAP1L</i>  | salmon |
| 4068   | <i>SH2D1A</i>   | salmon |
| 5949   | <i>RBP3</i>     | salmon |
| 57128  | <i>LYRM4</i>    | salmon |
| 79723  | <i>SUV39H2</i>  | salmon |
| 960    | <i>CD44</i>     | salmon |
| 23368  | <i>PPP1R13B</i> | salmon |
| 6737   | <i>TRIM21</i>   | salmon |
| 1043   | <i>CD52</i>     | salmon |
| 4939   | <i>OAS2</i>     | salmon |
| 6455   | <i>SH3GL1</i>   | salmon |
| 1521   | <i>CTSW</i>     | salmon |
| 7703   | <i>PCGF2</i>    | salmon |

|        |                 |        |
|--------|-----------------|--------|
| 79149  | <i>ZSCAN5A</i>  | salmon |
| 1058   | <i>CENPA</i>    | salmon |
| 4153   | <i>MBL2</i>     | salmon |
| 80380  | <i>PDCD1LG2</i> | salmon |
| 3037   | <i>HAS2</i>     | salmon |
| 6199   | <i>RPS6KB2</i>  | salmon |
| 2915   | <i>GRM5</i>     | salmon |
| 8530   | <i>CST7</i>     | salmon |
| 951    | <i>CD37</i>     | salmon |
| 51806  | <i>CALML5</i>   | salmon |
| 9447   | <i>AIM2</i>     | salmon |
| 2848   | <i>GPR25</i>    | salmon |
| 6732   | <i>SRPK1</i>    | salmon |
| 221692 | <i>PHACTR1</i>  | salmon |
| 10379  | <i>IRF9</i>     | salmon |
| 921    | <i>CD5</i>      | salmon |
| 22821  | <i>RASA3</i>    | salmon |
| 8828   | <i>NRP2</i>     | salmon |
| 672    | <i>BRCA1</i>    | salmon |
| 9050   | <i>PSTPIP2</i>  | salmon |
| 3340   | <i>NDST1</i>    | salmon |
| 5880   | <i>RAC2</i>     | salmon |
| 51154  | <i>MRTO4</i>    | salmon |
| 7517   | <i>XRCC3</i>    | salmon |
| 3002   | <i>GZMB</i>     | salmon |
| 3939   | <i>LDHA</i>     | salmon |
| 29992  | <i>PILRA</i>    | salmon |
| 90861  | <i>HN1L</i>     | salmon |
| 3932   | <i>LCK</i>      | salmon |
| 10849  | <i>CD3EAP</i>   | salmon |
| 27040  | <i>LAT</i>      | salmon |
| 2920   | <i>CXCL2</i>    | salmon |
| 998    | <i>CDC42</i>    | salmon |
| 3683   | <i>ITGAL</i>    | salmon |
| 27071  | <i>DAPP1</i>    | salmon |
| 140801 | <i>RPL10L</i>   | salmon |
| 54440  | <i>SASH3</i>    | salmon |
| 3980   | <i>LIG3</i>     | salmon |
| 3635   | <i>INPP5D</i>   | salmon |
| 5292   | <i>PIM1</i>     | salmon |
| 5721   | <i>PSME2</i>    | salmon |

|        |                 |        |
|--------|-----------------|--------|
| 8048   | <i>CSRP3</i>    | salmon |
| 26099  | <i>SZRD1</i>    | salmon |
| 254102 | <i>EHBP1L1</i>  | salmon |
| 5999   | <i>RGS4</i>     | salmon |
| 433    | <i>ASGR2</i>    | salmon |
| 56993  | <i>TOMM22</i>   | salmon |
| 713    | <i>C1QB</i>     | salmon |
| 5317   | <i>PKP1</i>     | salmon |
| 6515   | <i>SLC2A3</i>   | salmon |
| 653639 | <i>LYPLA2P1</i> | salmon |
| 7980   | <i>TFPI2</i>    | salmon |
| 1794   | <i>DOCK2</i>    | salmon |
| 6357   | <i>CCL13</i>    | salmon |
| 9143   | <i>SYNGR3</i>   | salmon |
| 5087   | <i>PBX1</i>     | salmon |
| 10347  | <i>ABCA7</i>    | salmon |
| 10578  | <i>GNLY</i>     | salmon |
| 22914  | <i>KLRK1</i>    | salmon |
| 4920   | <i>ROR2</i>     | salmon |
| 8361   | <i>HIST1H4F</i> | salmon |
| 7851   | <i>MALL</i>     | salmon |
| 5579   | <i>PRKCB</i>    | salmon |
| 5581   | <i>PRKCE</i>    | salmon |
| 9493   | <i>KIF23</i>    | salmon |
| 5433   | <i>POLR2D</i>   | salmon |
| 3561   | <i>IL2RG</i>    | salmon |
| 8540   | <i>AGPS</i>     | salmon |
| 8407   | <i>TAGLN2</i>   | salmon |
| 10721  | <i>POLQ</i>     | salmon |
| 7402   | <i>UTRN</i>     | salmon |
| 10544  | <i>PROCR</i>    | salmon |
| 925    | <i>CD8A</i>     | salmon |
| 51657  | <i>STYXL1</i>   | salmon |
| 2526   | <i>FUT4</i>     | salmon |
| 4001   | <i>LMNB1</i>    | salmon |
| 28526  | <i>TRDC</i>     | salmon |
| 4017   | <i>LOXL2</i>    | salmon |
| 4224   | <i>MEP1A</i>    | salmon |
| 51338  | <i>MS4A4A</i>   | salmon |
| 9734   | <i>HDAC9</i>    | salmon |
| 1437   | <i>CSF2</i>     | salmon |



|        |                  |        |
|--------|------------------|--------|
| 54976  | <i>C20orf27</i>  | salmon |
| 8869   | <i>ST3GAL5</i>   | salmon |
| 10326  | <i>SIRPB1</i>    | salmon |
| 3433   | <i>IFIT2</i>     | salmon |
| 919    | <i>CD247</i>     | salmon |
| 8348   | <i>HIST1H2BO</i> | salmon |
| 81285  | <i>OR51E2</i>    | salmon |
| 79180  | <i>EFHD2</i>     | salmon |
| 30817  | <i>ADGRE2</i>    | salmon |
| 1848   | <i>DUSP6</i>     | salmon |
| 23133  | <i>PHF8</i>      | salmon |
| 51571  | <i>FAM49B</i>    | salmon |
| 9334   | <i>B4GALT5</i>   | salmon |
| 220134 | <i>SKA1</i>      | salmon |
| 6664   | <i>SOX11</i>     | salmon |
| 5551   | <i>PRF1</i>      | salmon |
| 64806  | <i>IL25</i>      | salmon |
| 2119   | <i>ETV5</i>      | salmon |
| 4818   | <i>NKG7</i>      | salmon |
| 7128   | <i>TNFAIP3</i>   | salmon |
| 7157   | <i>TP53</i>      | salmon |
| 284119 | <i>PTRF</i>      | salmon |
| 9410   | <i>SNRNP40</i>   | salmon |
| 51365  | <i>PLA1A</i>     | salmon |
| 3594   | <i>IL12RB1</i>   | salmon |
| 10123  | <i>ARL4C</i>     | salmon |
| 5892   | <i>RAD51D</i>    | salmon |
| 864    | <i>RUNX3</i>     | salmon |
| 4317   | <i>MMP8</i>      | salmon |
| 3489   | <i>IGFBP6</i>    | salmon |
| 6279   | <i>S100A8</i>    | salmon |
| 51348  | <i>KLRF1</i>     | salmon |
| 5970   | <i>RELA</i>      | salmon |
| 2026   | <i>ENO2</i>      | salmon |
| 5266   | <i>PI3</i>       | salmon |
| 2161   | <i>F12</i>       | salmon |
| 2999   | <i>GZMH</i>      | salmon |
| 5179   | <i>PENK</i>      | salmon |
| 55140  | <i>ELP3</i>      | salmon |
| 5920   | <i>RARRES3</i>   | salmon |
| 56935  | <i>SMCO4</i>     | salmon |

|        |                  |        |
|--------|------------------|--------|
| 2841   | <i>GPR18</i>     | salmon |
| 3371   | <i>TNC</i>       | salmon |
| 3043   | <i>HBB</i>       | salmon |
| 64795  | <i>RMND5A</i>    | salmon |
| 3012   | <i>HIST1H2AE</i> | salmon |
| 440738 | <i>MAP1LC3C</i>  | salmon |
| 87     | <i>ACTN1</i>     | salmon |
| 80830  | <i>APOL6</i>     | salmon |
| 968    | <i>CD68</i>      | salmon |
| 3040   | <i>HBA2</i>      | salmon |
| 3001   | <i>GZMA</i>      | salmon |
| 154    | <i>ADRB2</i>     | salmon |
| 4162   | <i>MCAM</i>      | salmon |
| 6352   | <i>CCL5</i>      | salmon |
| 115123 | <i>MARCHF3</i>   | salmon |

**Supplemental Table S6: List of 194 significantly associated pathways (p<0.05) from genes in the three HF modules**

| Ingenuity Canonical Pathways                                                 | -log(B-H p-value) | Molecules                                                                                                                                                                                                                                                                                                                                                        |
|------------------------------------------------------------------------------|-------------------|------------------------------------------------------------------------------------------------------------------------------------------------------------------------------------------------------------------------------------------------------------------------------------------------------------------------------------------------------------------|
| Hepatic Fibrosis / Hepatic Stellate Cell Activation                          | 1.11E+01          | A2M,ACTA2,AGTR1,BAX,CCL2,CCL5,CD14,CD40,COL11A2, COL13A1, COL15A1, COL1A1, COL1A2, COL21A1, COL4A1, COL4A2, COL5A2, COL6A3, CXCL3, EDNRA, FAS, FGF2, FLT4, FN1, ICAM1, IFNAR2, IFNGR1, IFNGR2, IGF2, IGFBP4, IGFBP5, IL10RA, IL1B, IL1R1, IL1RL1, IL4R, KDR, LY96, MMP2, MYH11, PDGFB, PDGFD, PDGFRA, PGF, RELA, SMAD7, TGFB1, TGFB2, TGFB2, TLR4, TNF, TNFRSF1B |
| Th1 and Th2 Activation Pathway                                               | 1.05E+01          | CD247,CD3D,CD4,CD40,CD8A,CXCR4,GATA3,HLA-DMA,HLA-DMB,HLA-DOA,HLA-DPA1,HLA-DPB1,HLA-DQA1,HLA-DQB1,HLA-DRA,HLA-DRB1,ICAM1,IFNGR1,IFNGR2,IL10RA,IL12A,IL12RB1,IL1RL1,IL25,IL27RA,IL2RB,IL2RG,IL4R,IRF1,ITGB2,JAG2,JUN,LGALS9,NFATC4,NOTCH1,NOTCH3,NOTCH4,PIK3C2B,PIK3R3,RUNX3,S1PR1,SPI1,TGFB1,TGFB2,TNFRSF4,VAV1                                                   |
| Role of Pattern Recognition Receptors in Recognition of Bacteria and Viruses | 9.79E+00          | C1QA,C1QB,C3AR1,C5AR1,CASP1,CCL5,CD70,CLEC7A,CSF2,EIF2AK2,EIF2S1,IFIH1,IL12A,IL17B,IL1B,IL25,IRF7,LTB,MAPK12,MBL2,MYD88,NOD2,OAS1,OAS2,OAS3,PIK3C2B,PIK3R3,PRKCB,PRKCE,PRKCH,PRKD3,RELA,TGFB1,TGFB2,TLR1,TLR4,TLR6,TLR7,TLR8,TNF,TNFSF10,TNFSF12                                                                                                                 |
| Th2 Pathway                                                                  | 8.89E+00          | CD247,CD3D,CD4,CD40,CXCR4,GATA3,HLA-DMA,HLA-DMB,HLA-DOA,HLA-DPA1,HLA-DPB1,HLA-DQA1,HLA-DQB1,HLA-DRA,HLA-DRB1,ICAM1,IL12A,IL12RB1,IL1RL1,IL25,IL2RB,IL2RG,IL4R,ITGB2,JAG2,JUN,NOTCH1,NOTCH3,NOTCH4,PIK3C2B,PIK3R3,RUNX3,S1PR1,SPI1,TGFB1,TGFB2,TNFRSF4,VAV1                                                                                                       |
| Systemic Lupus Erythematosus In B Cell Signaling Pathway                     | 8.49E+00          | BTK,CALML5,CCND1,CD40,CD5,CD70,CD79B,CSF2,CSK,FGR,HCK,IFIH1,IFIT2,IFIT3,IFNAR2,IFNGR1,IFNGR2,IL12A,IL17B,IL1B,IL25,INPP5D,INPP5K,IRF7,IRF9,ISG15,ISG20,JUN,LCK,LTB,LYN,MAP3K14,MAP4K4,MCL1,MRAS,MYC,MYD88,NFATC4,NRAS,PIK3C2B,PIK3R3,PLAAT4,PRKCB,PRKCE,PRKCH,PRKD3,RAC2,RALB,RAP2B,RELA,TGFB1,TGFB2,TLR7,TLR8,TNF,TNFSF10,TNFSF12,VAV1                          |

|                                                                                |          |                                                                                                                                                                                                                                                                                                                                             |
|--------------------------------------------------------------------------------|----------|---------------------------------------------------------------------------------------------------------------------------------------------------------------------------------------------------------------------------------------------------------------------------------------------------------------------------------------------|
| Th1 Pathway                                                                    | 8.16E+00 | CD247,CD3D,CD4,CD40,CD8A,GATA3,HLA-DMA,HLA-DMB,HLA-DOA,HLA-DPA1,HLA-DPB1,HLA-DQA1,HLA-DQB1,HLA-DRA,HLA-DRB1,ICAM1,IFNGR1,IFNGR2,IL10RA,IL12A,IL12RB1,IL27RA,IRF1,ITGB2,LGALS9,NFATC4,NOTCH1,NOTCH3,NOTCH4,PIK3C2B,PIK3R3,RUNX3,VAV1                                                                                                         |
| Type I Diabetes Mellitus Signaling                                             | 8.09E+00 | CASP8,CD247,CD3D,FAS,FCER1G,GZMB,HLA-DMA,HLA-DMB,HLA-DOA,HLA-DQA1,HLA-DQB1,HLA-DRA,HLA-DRB1,HLA-E,ICA1,IFNGR1,IFNGR2,IKBKB,IL12A,IL1B,IL1R1,IRF1,MAP3K14,MAPK11,MAPK12,MAPK14,MYD88,NFKBIE,PRF1,RELA,SOCS2,TNF,TNFRSF1B                                                                                                                     |
| iCOS-iCOSL Signaling in T Helper Cells                                         | 7.45E+00 | CALML5,CD247,CD3D,CD4,CD40,CSK,FCER1G,HLA-DMA,HLA-DMB,HLA-DOA,HLA-DQA1,HLA-DQB1,HLA-DRA,HLA-DRB1,IKBKB,IL2RB,IL2RG,INPP5D,ITK,ITPR3,LAT,LCK,LCP2,NFATC4,NFKBIE,PIK3C2B,PIK3R3,PTEN,PTPRC,RELA,VAV1                                                                                                                                          |
| Interferon Signaling                                                           | 7.33E+00 | BAK1,BAX,IFI35,IFI6,IFIT3,IFITM1,IFITM3,IFNAR2,IFNGR1,IFNGR2,IRF1,IRF9,ISG15,MX1,OAS1,PSMB8,RELA,TAP1                                                                                                                                                                                                                                       |
| CD28 Signaling in T Helper Cells                                               | 6.98E+00 | ARPC1B,ARPC2,CALML5,CD247,CD3D,CD4,CDC42,CSK,FCER1G,HLA-DMA,HLA-DMB,HLA-DOA,HLA-DQA1,HLA-DQB1,HLA-DRA,HLA-DRB1,IKBKB,ITK,ITPR3,JUN,LAT,LCK,LCP2,MAPK12,NFATC4,NFKBIE,PIK3C2B,PIK3R3,PTPRC,RELA,VAV1,WAS                                                                                                                                     |
| Role of Macrophages, Fibroblasts and Endothelial Cells in Rheumatoid Arthritis | 6.80E+00 | C5AR1,CALML5,CCL2,CCL5,CCND1,CEBPA,CEBPB,CEBPG,CSF2,DKK1,DKK3,FCGR3A/FCGR3B,FGF2,FN1,FRZB,FZD4,ICAM1,IKBKB,IL16,IL1B,IL1R1,IL1RL1,IL32,IL7,JUN,LTB,MAP3K14,MAPK14,MMP3,MRAS,MYC,MYD88,NFATC4,NFKBIE,NRAS,PDGFB,PDGFD,PGF,PIK3C2B,PIK3R3,PRKCB,PRKCE,PRKCH,PRKD3,RALB,RAP2B,RELA,ROR2,TCF3,TGFB1,TLR1,TLR4,TLR6,TLR7,TLR8,TNF,TNFRSF1B,WNT5B |
| Dendritic Cell Maturation                                                      | 6.33E+00 | CD1D,CD40,CD58,COL11A2,COL1A1,COL1A2,CSF2,FCER1G,FCGR3A/FCGR3B,FSCN1,HLA-DMA,HLA-DMB,HLA-DOA,HLA-DQA1,HLA-DQB1,HLA-DRA,HLA-DRB1,HLA-E,ICAM1,IKBKB,IL12A,IL1B,IL32,IRF8,LTB,LY75,MAP3K14,MAPK11,MAPK12,MAPK14,MYD88,NFKBIE,PIK3C2B,PIK3R3,RELA,TLR4,TNF,TNFRSF1B,TYROBP                                                                      |

|                                                             |                                                                                                                                                                                                                                                                                                                                                                    |
|-------------------------------------------------------------|--------------------------------------------------------------------------------------------------------------------------------------------------------------------------------------------------------------------------------------------------------------------------------------------------------------------------------------------------------------------|
| OX40 Signaling Pathway                                      | 6.24E+00 CD247,CD3D,CD4,FCER1G,HLA-DMA,HLA-DMB,HLA-DOA,HLA-DPA1,HLA-DPB1,HLA-DQA1,HLA-DQB1,HLA-DRA,HLA-DRB1,HLA-E,JUN,MAPK12,NFKBIE,RELA,TNFRSF4                                                                                                                                                                                                                   |
| Tec Kinase Signaling                                        | 6.24E+00 ACTA2,ACTC1,BLK,BTK,CDC42,FAS,FCER1A,FCER1G,FGFR,GNA14,GNG11,GNG7,HCK,ITGA4,ITGA5,ITK,LCK,LYN,MAPK12,MRAS,PIK3C2B,PIK3R3,PRKCB,PRKCE,PRKCH,PRKD3,RAC2,RELA,RHOBTB1,RHOC,RND3,TLR4,TNF,TNFRSF10B,TNFSF10,TNFSF12,VAV1,WAS                                                                                                                                  |
| PD-1, PD-L1 cancer immunotherapy pathway                    | 6.24E+00 CD247,CSK,HLA-DMA,HLA-DMB,HLA-DOA,HLA-DPA1,HLA-DPB1,HLA-DQA1,HLA-DQB1,HLA-DRA,HLA-DRB1,HLA-E,IFNGR1,IFNGR2,IL12A,IL2RB,IL2RG,LAT,LCK,LCP2,PD-CD1LG2,PIK3C2B,PIK3R3,PTEN,TGFB1,TGFB2,TNF,TNFRSF1B                                                                                                                                                          |
| Neuroinflammation Signaling Pathway                         | 6.06E+00 BIRC5,BIRC7,CASP1,CASP8,CCL2,CCL5,CD40,CSF1R,CX3CL1,CX3CR1,CYBB,FAS,HLA-DMA,HLA-DMB,HLA-DOA,HLA-DQA1,HLA-DQB1,HLA-DRA,HLA-DRB1,HLA-E,ICAM1,IFNGR1,IFNGR2,IKBKB,IL12A,IL1B,IL1R1,IRF7,JUN,MAPK11,MAPK12,MAPK14,MFGE8,MMP3,MYD88,NCF2,NFATC4,PIK3C2B,PIK3R3,PLA2G4A,PLA2G4C,PLYCARD,RELA,SLC1A3,SOD2,TGFB1,TGFB2,TGFBR2,TLR1,TLR4,TLR6,TLR7,TLR8,TNF,TYROBP |
| T Helper Cell Differentiation                               | 6.05E+00 BCL6,CD40,FCER1G,GATA3,HLA-DMA,HLA-DMB,HLA-DOA,HLA-DQA1,HLA-DQB1,HLA-DRA,HLA-DRB1,IFNGR1,IFNGR2,IL10RA,IL12A,IL12RB1,IL2RG,IL4R,TGFB1,TGFBR2,TNF,TNFRSF1B                                                                                                                                                                                                 |
| Altered T Cell and B Cell Signaling in Rheumatoid Arthritis | 6.05E+00 CD40,CD79B,CSF2,FAS,FCER1G,HLA-DMA,HLA-DMB,HLA-DOA,HLA-DQA1,HLA-DQB1,HLA-DRA,HLA-DRB1,IL12A,IL1B,LTB,MAP3K14,RELA,TGFB1,TLR1,TLR4,TLR6,TLR7,TLR8,TNF                                                                                                                                                                                                      |
| TREM1 Signaling                                             | 5.94E+00 CASP1,CCL2,CD40,CSF2,CXCL3,ICAM1,IL1B,IL1RL1,ITGA5,ITGAX,LAT2,MYD88,NOD2,RELA,TLR1,TLR4,TLR6,TLR7,TLR8,TNF,TYROBP                                                                                                                                                                                                                                         |
| Phagosome Formation                                         | 5.89E+00 C3AR1,C5AR1,CDC42,CLEC7A,FCER1A,FCER1G,FCGR3A/FCGR3B,FN1,ITGA4,ITGA5,ITGAM,ITGAX,ITGB2,MBL2,PIK3C2B,PIK3R3,PRKCB,PRKCE,PRKCH,PRKD3,RHOBTB1,RHOC,RND3,TLR1,TLR4,TLR6,TLR7,TLR8                                                                                                                                                                             |

|                                                            |          |                                                                                                                                                                                                                                                   |
|------------------------------------------------------------|----------|---------------------------------------------------------------------------------------------------------------------------------------------------------------------------------------------------------------------------------------------------|
| Leukocyte Extravasation Signaling                          | 5.87E+00 | ACTA2,ACTC1,ACTN1,AFDN,ARHGAP4,BTK,CD44,CDC42,CDH5,CXCR4,CYBA,CYBB,ICAM1,ITGA4,ITGA5,ITGAL,ITGAM,ITGB2,ITK,JAM2,MAPK11,MAPK12,MAPK14,MMP2,MMP3,MMP8,NCF2,NCF4,PECAM1,PIK3C2B,PIK3R3,PRKCB,PRKCE,PRKCH,PRKD3,RAC2,SELPLG,SIPA1,VASP,VAV1,WAS,WIPF1 |
| HMGB1 Signaling                                            | 5.87E+00 | CCL2,CD70,CDC42,CSF2,ICAM1,IFNGR1,IFNGR2,IL12A,IL17B,IL1B,IL1R1,IL25,JUN,LTB,MAPK11,MAPK12,MAPK14,MRAS,NRAS,PIK3C2B,PIK3R3,PLAT,RAC2,RALB,RAP2B,RELA,RHOBTB1,RHOC,RND3,TGFB1,TGFB2,TLR4,TNF,TNFRSF1B,TNFSF10,TNFSF12                              |
| Role of NFAT in Regulation of the Immune Response          | 5.63E+00 | BTK,CALML5,CD247,CD3D,CD4,CD79B,FCER1A,FCER1G,FCGR3A/FCGR3B,GNA14,GNG11,GNG7,HLA-DMA,HLA-DMB,HLA-DOA,HLA-DQA1,HLA-DQB1,HLA-DRA,HLA-DRB1,IKBKB,ITK,ITPR3,JUN,LAT,LCK,LCP2,LYN,MEF2C,MRAS,NFATC4,NFKBIE,NRAS,PIK3C2B,PIK3R3,RALB,RAP2B,RCAN2,RELA   |
| Antigen Presentation Pathway                               | 5.63E+00 | CD74,HLA-DMA,HLA-DMB,HLA-DOA,HLA-DPA1,HLA-DPB1,HLA-DQA1,HLA-DQB1,HLA-DRA,HLA-DRB1,HLA-E,PSMB8,PSMB9,TAP1,TAP2                                                                                                                                     |
| Calcium-induced T Lymphocyte Apoptosis                     | 5.52E+00 | ATP2A3,CALML5,CD247,CD3D,CD4,FCER1G,HLA-DMA,HLA-DMB,HLA-DOA,HLA-DQA1,HLA-DQB1,HLA-DRA,HLA-DRB1,ITPR3,LCK,PRKCB,PRKCE,PRKCH,PRKD3                                                                                                                  |
| Allograft Rejection Signaling                              | 5.52E+00 | CD40,FAS,FCER1G,GZMB,HLA-DMA,HLA-DMB,HLA-DOA,HLA-DPA1,HLA-DPB1,HLA-DQA1,HLA-DQB1,HLA-DRA,HLA-DRB1,HLA-E,PRF1,TNF                                                                                                                                  |
| Toll-like Receptor Signaling                               | 5.52E+00 | CD14,EIF2AK2,IKBKB,IL12A,IL1B,IL1RL1,JUN,LY96,MAP3K14,MAP4K4,MAPK11,MAPK12,MAPK14,MYD88,RELA,TLR1,TLR4,TLR6,TLR7,TLR8,TNF,TNFAIP3                                                                                                                 |
| Crosstalk between Dendritic Cells and Natural Killer Cells | 5.45E+00 | ACTA2,ACTC1,CD40,CD69,CSF2,FAS,FSCN1,HLA-DRA,HLA-DRB1,HLA-E,IL12A,IL15RA,IL2RB,IL2RG,ITGAL,KLRC4-KLRK1/KLRK1,LTB,PRF1,RELA,TLR4,TLR7,TNF,TNFRSF1B,TNFSF10,TYROBP                                                                                  |
| Cdc42 Signaling                                            | 5.35E+00 | ARHGEF6,ARPC1B,ARPC2,CD247,CD3D,CDC42,CDC42SE1,FCER1G,FGD1,HLA-DMA,HLA-DMB,HLA-DOA,HLA-DPA1,HLA-DPB1,HLA-DQA1,HLA-DQB1,HLA-DRA,HLA-DRB1,HLA-E,ITGA4,ITGA5,ITK,JUN,MAP3K11,MAPK11,MAPK12,MAPK14,VAV1,WAS,WIPF1                                     |

|                                                                 |                                                                                                                                                                                                                                                                                 |
|-----------------------------------------------------------------|---------------------------------------------------------------------------------------------------------------------------------------------------------------------------------------------------------------------------------------------------------------------------------|
| Phospholipase C Signaling                                       | 4.97E+00 ADCY1,ADCY3,ARHGEF15,ARHGEF2,ARHGEF6,ARHGEF7,BTK,CALML5,CD247,CD3D,CD79B,CDC42,FCER1G,GNG11,GNG7,HDAC7,HDAC9,ITGA4,ITGA5,ITK,ITPR3,LAT,LCK,LCP2,LYN,MEF2C,MRAS,NFATC4,NRAS,PLA2G4A,PLA2G4C,PRKCB,PRKCE,PRKCH,PRKD3,RAC2,RALB,RAP2B,RELA,RHOBTB1,RHOC,RND3,RPS6KA3,TGM2 |
| Fcε Receptor-mediated Phagocytosis in Macrophages and Monocytes | 4.96E+00 ACTA2,ACTC1,ARPC1B,ARPC2,CDC42,CSF2,FCGR3A/FCGR3B,FGR,FYB1,HCK,INPP5D,LCP2,LYN,NCK1,PIK3R3,PRKCB,PRKCE,PRKCH,PRKD3,PTEN,RAC2,RPS6KB2,VASP,VAV1,WAS                                                                                                                     |
| iNOS Signaling                                                  | 4.90E+00 CALML5,CD14,HMGA1,IFNGR1,IFNGR2,IKBKB,IRF1,JUN,LY96,MAPK11,MAPK12,MAPK14,MYD88,NFKBIE,RELA,TLR4                                                                                                                                                                        |
| IL-8 Signaling                                                  | 4.80E+00 ARRB2,BAX,CCND1,CDC42,CSTB,CXCR2,CYBB,FLT4,GNG11,GNG7,ICAM1,IKBKB,ITGAM,ITGAX,ITGB2,JUN,KDR,MAP4K4,MAPK12,MMP2,MRAS,NCF2,NRAS,PGF,PIK3C2B,PIK3R3,PRKCB,PRKCE,PRKCH,PRKD3,RAC2,RALB,RAP2B,RELA,RHOBTB1,RHOC,RND3,TEK,VASP                                               |
| Granulocyte Adhesion and Diapedesis                             | 4.80E+00 C5AR1,CCL13,CCL18,CCL2,CCL4,CCL5,CDH5,CKLF,CSF3R,CX3CL1,CXCL2,CXCL3,CXCR2,CXCR4,FPR1,ICAM1,ICAM2,IL1B,IL1R1,IL1RL1,ITGA4,ITGA5,ITGAL,ITGAM,ITGB2,MMP2,MMP3,MMP8,PECAM1,SELL,SELP,SELPLG,TNFRSF1B                                                                       |
| B Cell Receptor Signaling                                       | 4.80E+00 BCL2A1,BCL6,BTK,CALML5,CD79B,CDC42,CSK,DAPP1,ETS1,IKBKB,INPP5D,INPP5K,JUN,LYN,MAP3K11,MAP3K14,MAPK11,MAPK12,MAPK14,MEF2C,MRAS,NFATC4,NFKBIE,NRAS,PIK3C2B,PIK3R3,PRKCB,PTEN,PTPRC,RAC2,RALB,RAP2B,RELA,RPS6KB2,TCF3,VAV1                                                |
| T Cell Exhaustion Signaling Pathway                             | 4.80E+00 BCL6,FCER1G,GZMB,HLA-DMA,HLA-DMB,HLA-DOA,HLA-DPA1,HLA-DPB1,HLA-DQA1,HLA-DQB1,HLA-DRA,HLA-DRB1,HLA-E,IFNAR2,IL10RA,IL12A,IL12RB1,IRF9,JUN,KDR,LGALS9,MAPK12,MRAS,NFATC4,NRAS,PDCD1LG2,PIK3C2B,PIK3R3,PRDM1,RALB,RAP2B,TGFB1,TGFBR2,TNFRSF14                             |
| Hepatic Cholestasis                                             | 4.68E+00 ABCC1,ADCY1,ADCY3,CD14,CD70,CETP,CSF2,IKBKB,IL12A,IL17B,IL1B,IL1R1,IL1RL1,IL25,JUN,LTB,LY96,MAP3K14,MAPK12,MYD88,NFKBIE,NR5A2,PRKCB,PRKCE,PRKCH,PRKD3,RELA,RXRA,SLCO3A1,TGFB1,TGFB2,TLR4,TNFRSF1B,TNFRSF10,TNFRSF12                                                    |

|                                                          |                                                                                                                                                                                                                                                                                                                                                                                                                                                                  |
|----------------------------------------------------------|------------------------------------------------------------------------------------------------------------------------------------------------------------------------------------------------------------------------------------------------------------------------------------------------------------------------------------------------------------------------------------------------------------------------------------------------------------------|
| STAT3 Pathway                                            | 4.63E+00 CXCR2,FGF2,FLT4,IL10RA,IL12RB1,IL15RA,IL1B,IL1R1,IL1RL1,IL27RA,IL2RB,IL2RG,IL4R,KDR,MAP3K11,MAPK11,MAPK12,MAPK14,MRAS,MYC,NRAS,PDGFB,PDGFRA,PIM1,RALB,RAP2B,SOCS2,TGFB1,TGFB2,TGFBR2                                                                                                                                                                                                                                                                    |
| Cardiac Hypertrophy Signaling (Enhanced)                 | 4.62E+00 ADCY1,ADCY3,ADRB2,AGTR1,ATP2A3,CACNA1C,CALML5,CD70,CSF2,CXCR2,CYBB,EDNRA,EIF2B4,FGF2,FGF8,FZD4,GNA14,GNG11,GNG7,HDAC7,HDAC9,HSPB3,IKKB,IL10RA,IL12A,IL12RB1,IL15RA,IL17B,IL1B,IL1R1,IL1RL1,IL25,IL27RA,IL2RB,IL2RG,IL4R,ITGA4,ITGA5,ITPR3,JUN,LTB,MAP3K11,MAP3K14,MAPK11,MAPK12,MAPK14,MEF2C,MRAS,MYC,NFATC4,NRAS,PDE2A,PDE5A,PIK3C2B,PIK3R3,PRKCB,PRKCE,PRKCH,PRKD3,PTEN,RALB,RAP2B,RELA,RPS6KB2,TGFB1,TGFB2,TGFBR2,TNF,TNFRSF1B,TNFSF10,TNFSF12,WNT5B |
| Atherosclerosis Signaling                                | 4.61E+00 CCL2,CCR2,CD40,COL11A2,COL1A1,COL1A2,CXCR4,ICAM1,IL1B,ITGA4,ITGB2,LYZ,MMP3,PDGFB,PDGFD,PLA2G4A,PLA2G4C,PLA2G7,PLAAT4,RELA,S100A8,SELP,SELP,SELP,SERPINA1,TGFB1,TNF,TNFRSF14,TNFSF12                                                                                                                                                                                                                                                                     |
| NF-κB Activation by Viruses                              | 4.55E+00 CD4,EIF2AK2,IKKB,ITGA4,ITGA5,ITGAL,ITGB2,LCK,MAP3K14,MRAS,NFKBIE,NRAS,PIK3C2B,PIK3R3,PRKCB,PRKCE,PRKCH,PRKD3,RALB,RAP2B,RELA,TNFRSF14                                                                                                                                                                                                                                                                                                                   |
| Acute Phase Response Signaling                           | 4.48E+00 A2M,C2,CEBPB,CP,F8,FN1,HAMP,HP,IKKB,IL1B,IL1R1,JUN,MAP3K14,MAPK11,MAPK12,MAPK14,MBL2,MRAS,MYD88,NFKBIE,NRAS,OSMR,PIK3R3,RALB,RAP2B,RBP1,RBP3,RELA,SERPINA1,SERPINA3,SOCS2,SOD2,TCF3,TNF,TNFRSF1B,VWF                                                                                                                                                                                                                                                    |
| B Cell Development                                       | 4.48E+00 CD40,CD79B,HLA-DMA,HLA-DMB,HLA-DOA,HLA-DQA1,HLA-DQB1,HLA-DRA,HLA-DRB1,IL7,PTPRC,RAG1                                                                                                                                                                                                                                                                                                                                                                    |
| Systemic Lupus Erythematosus In T Cell Signaling Pathway | 4.46E+00 BCL6,CASP1,CASP10,CASP4,CASP8,CD247,CD3D,CD44,CD70,CDC42,FAS,FCER1G,HLA-DMA,HLA-DMB,HLA-DOA,HLA-DPA1,HLA-DPB1,HLA-DQA1,HLA-DQB1,HLA-DRA,HLA-DRB1,HLA-E,ITGAL,JUN,LAT,MRAS,NOS3,NRAS,PIK3C2B,PIK3R3,RAC2,RALB,RAP2B,RHOBTB1,RHOC,RND3,RPS6KB2,SELP,PLG,VAV1                                                                                                                                                                                              |
| Natural Killer Cell Signaling                            | 4.41E+00 CD247,CD300A,FCER1G,FCGR3A/FCGR3B,INPP5D,INPP5K,KLRK4-KLRK1/KLRK1,LAIR1,LAT,LCK,LCP2,MRAS,NCK1,NRAS,PIK3C2B,PIK3R3,PRKCB,PRKCE,PRKCH,PRKD3,RAC2,RALB,RAP2B,SH2D1A,SIGLEC7,TYROBP,VAV1                                                                                                                                                                                                                                                                   |



|                                                                       |          |                                                                                                                                                                                                                       |
|-----------------------------------------------------------------------|----------|-----------------------------------------------------------------------------------------------------------------------------------------------------------------------------------------------------------------------|
| Fc Epsilon RI Signaling                                               | 4.41E+00 | BTK,CSF2,FCER1A,FCER1G,INPP5D,INPP5K,LAT,LCP2,LYN,MAPK11,MAPK12,MAPK14,MRAS,NRAS,PIK3C2B,PIK3R3,PLA2G4A,PLA2G4C,PRKCB,PRKCE,PRKCH,PRKD3,RAC2,RALB,RAP2B,TNF,VAV1                                                      |
| Graft-versus-Host Disease Signaling                                   | 4.34E+00 | FAS,FCER1G,GZMB,HLA-DMA,HLA-DMB,HLA-DOA,HLA-DQA1,HLA-DQB1,HLA-DRA,HLA-DRB1,HLA-E,IL1B,PRF1,TNF                                                                                                                        |
| Paxillin Signaling                                                    | 4.23E+00 | ACTA2,ACTC1,ACTN1,ARHGEF6,ARHGEF7,CDC42,CSK,ITGA10,ITGA4,ITGA5,ITGA8,ITGAL,ITGAM,ITGAX,ITGB2,MAPK11,MAPK12,MAPK14,MRAS,NCK1,NRAS,PIK3C2B,PIK3R3,RALB,RAP2B                                                            |
| PKC $\theta$ Signaling in T Lymphocytes                               | 4.21E+00 | CACNA1C,CD247,CD3D,CD4,FCER1G,HLA-DMA,HLA-DMB,HLA-DOA,HLA-DQA1,HLA-DQB1,HLA-DRA,HLA-DRB1,IKBKB,JUN,LAT,LCK,LCP2,MAP3K11,MAP3K14,MRAS,NFATC4,NFKBIE,NRAS,PIK3C2B,PIK3R3,RAC2,RALB,RAP2B,RELA,VAV1                      |
| T Cell Receptor Signaling                                             | 4.15E+00 | BTK,CALML5,CD247,CD3D,CD4,CD8A,CSK,IKBKB,ITK,JUN,LAT,LCK,LCP2,MRAS,NFATC4,NRAS,PIK3C2B,PIK3R3,PTPRC,PTPRH,RALB,RAP2B,RELA,VAV1                                                                                        |
| LPS-stimulated MAPK Signaling                                         | 4.07E+00 | CD14,CDC42,IKBKB,JUN,MAP3K14,MAPK11,MAPK12,MAPK14,MRAS,NFKBIE,NRAS,PIK3C2B,PIK3R3,PRKCB,PRKCE,PRKCH,PRKD3,RALB,RAP2B,RELA,TLR4                                                                                        |
| IL-12 Signaling and Production in Macrophages                         | 3.99E+00 | CD40,CEBPB,IFNGR1,IKBKB,IL12A,IL12RB1,IRF1,IRF8,JUN,LYZ,MAPK11,MAPK12,MAPK14,MYD88,PIK3C2B,PIK3R3,PRKCB,PRKCE,PRKCH,PRKD3,RELA,RXRA,S100A8,SERPINA1,SPI1,TGFB1,TGFB2,TLR4,TNF                                         |
| Autoimmune Thyroid Disease Signaling                                  | 3.94E+00 | CD40,FAS,FCER1G,GZMB,HLA-DMA,HLA-DMB,HLA-DOA,HLA-DQA1,HLA-DQB1,HLA-DRA,HLA-DRB1,HLA-E,PRF1                                                                                                                            |
| Agranulocyte Adhesion and Diapedesis                                  | 3.81E+00 | ACTA2,ACTC1,C5AR1,CCL13,CCL18,CCL2,CCL4,CCL5,CD34,CDH5,CKLF,CX3CL1,CXCL2,CXCL3,CXCR2,CXCR4,FN1,ICAM1,ICAM2,IL1B,IL1R1,ITGA4,ITGA5,ITGB2,MMP2,MMP3,MMP8,MYH11,PECAM1,SELL,SELP,SELPLG,TNF                              |
| Production of Nitric Oxide and Reactive Oxygen Species in Macrophages | 3.70E+00 | CDC42,CYBA,CYBB,IFNGR1,IFNGR2,IKBKB,IRF1,IRF8,JUN,LYZ,MAP3K11,MAP3K14,MAPK11,MAPK12,MAPK14,NCF2,NCF4,NFKBIE,PIK3C2B,PIK3R3,PRKCB,PRKCE,PRKCH,PRKD3,RAC2,RELA,RHOBTB1,RHOC,RND3,S100A8,SERPINA1,SPI1,TLR4,TNF,TNFRSF1B |
| IL-4 Signaling                                                        | 3.65E+00 | HLA-DMA,HLA-DMB,HLA-DOA,HLA-DQA1,HLA-DQB1,HLA-DRA,HLA-DRB1,HMGA1,IL2RG,IL4R,INPP5D,INPP5K,MRAS,NFATC4,NRAS,PIK3C2B,PIK3R3,RALB,RAP2B,RPS6KB2                                                                          |

|                                                        |          |                                                                                                                                                                                                                                  |
|--------------------------------------------------------|----------|----------------------------------------------------------------------------------------------------------------------------------------------------------------------------------------------------------------------------------|
| Inflammasome pathway                                   | 3.62E+00 | AIM2,CASP1,CASP8,IL1B,MYD88,NLRP1,NOD2,PYCARD,TLR4                                                                                                                                                                               |
| Communication between Innate and Adaptive Immune Cells | 3.58E+00 | CCL4,CCL5,CD4,CD40,CD79B,CD8A,CSF2,FCER1G,HLA-DRA,HLA-DRB1,HLA-E,IL12A,IL1B,TLR1,TLR4,TLR6,TLR7,TLR8,TNF                                                                                                                         |
| Integrin Signaling                                     | 3.58E+00 | ACTA2,ACTC1,ACTN1,ARHGAP26,ARHGEF7,ARPC1B,ARPC2,ASAP1,CDC42,ITGA10,ITGA4,ITGA5,ITGA8,ITGAL,ITGAM,ITGAX,ITGB2,MAP3K11,MRAS,NCK1,NRAS,PARVB,PDGFB,PFN1,PIK3C2B,PIK3R3,PTEN,RAC2,RALB,RAP2B,RHOBTB1,RHOC,RND3,TSPAN7,VASP,WAS,WIPF1 |
| GP6 Signaling Pathway                                  | 3.51E+00 | BTK,CALML5,COL11A2,COL13A1,COL15A1,COL1A1,COL1A2,COL21A1,COL4A1,COL4A2,COL5A2,COL6A3,FCER1G,LAMA2,LAMA4,LAT,LCP2,LYN,PIK3C2B,PIK3R3,PRKCB,PRKCE,PRKCH,PRKD3                                                                      |
| Apoptosis Signaling                                    | 3.46E+00 | BAK1,BAX,BCL2A1,CASP10,CASP8,CDK1,FAS,GAS2,IKKB,MAP3K14,MAP4K4,MCL1,MRAS,NFKBIE,NRAS,PRKCE,RALB,RAP2B,RELA,TNF,TNFRSF1B,TP53                                                                                                     |
| NF-κB Signaling                                        | 3.41E+00 | CASP8,CD40,EIF2AK2,FCER1G,FLT4,IKKB,IL1B,IL1R1,KDR,LCK,MAP3K14,MAP4K4,MRAS,MYD88,NFKBIE,NRAS,PDGFRA,PIK3C2B,PIK3R3,PRKCB,RALB,RAP2B,RELA,TGFBR2,TLR1,TLR4,TLR6,TLR7,TLR8,TNF,TNFAIP3,TNFRSF1B                                    |
| IL-6 Signaling                                         | 3.40E+00 | A2M,CD14,CEBPB,COL1A1,HSPB3,IKKB,IL1B,IL1R1,IL1RL1,JUN,MAP3K14,MAP4K4,MAPK11,MAPK12,MAPK14,MCL1,MRAS,NFKBIE,NRAS,PIK3C2B,PIK3R3,RALB,RAP2B,RELA,TNF,TNFRSF1B                                                                     |
| Apelin Endothelial Signaling Pathway                   | 3.40E+00 | ADCY1,ADCY3,APLNR,CALML5,CCL2,ICAM1,JUN,KLF2,MAPK12,MEF2C,MRAS,NOS3,NRAS,PIK3C2B,PIK3R3,PRKCB,PRKCE,PRKCH,PRKD3,RALB,RAP2B,RELA,RPS6KB2,TEK                                                                                      |
| Colorectal Cancer Metastasis Signaling                 | 3.35E+00 | ADCY1,ADCY3,ARRB1,BAX,BIRC5,CCND1,CDC42,FZD4,GNG11,GNG7,IFNGR1,JUN,MAPK12,MMP2,MMP3,MMP8,MRAS,MYC,NRAS,PGF,PIK3C2B,PIK3R3,RAC2,RALB,RAP2B,RELA,RHOBTB1,RHOC,RND3,TCF3,TGFB1,TGFB2,TGFBR2,TLR1,TLR4,TLR6,TLR7,TLR8,TNF,TP53,WNT5B |
| fMLP Signaling in Neutrophils                          | 3.34E+00 | ARPC1B,ARPC2,CALML5,CDC42,CYBB,FPR1,GNG11,GNG7,ITPR3,MRAS,NCF2,NFATC4,NFKBIE,NRAS,PIK3C2B,PIK3R3,PRKCB,PRKCE,PRKCH,PRKD3,RALB,RAP2B,RELA,WAS                                                                                     |
| Primary Immunodeficiency Signaling                     | 3.34E+00 | ADA,BTK,CD3D,CD4,CD40,CD8A,IL2RG,LCK,PTPRC,RAG1,RFX5,TAP1,TAP2                                                                                                                                                                   |

|                                              |          |                                                                                                                                                                                                                                  |
|----------------------------------------------|----------|----------------------------------------------------------------------------------------------------------------------------------------------------------------------------------------------------------------------------------|
| HOTAIR Regulatory Pathway                    | 3.34E+00 | AR,ATG7,CD44,COL1A1,COL1A2,DNMT3B,EZH2,FOXM1,ICAM1,IRF1,JAM2,MMP2,MMP3,MMP8,MYC,PIK3C2B,PIK3R3,PTEN,RBBP4,RELA,REST,RHOC,SNAI2,TCF3,TGFB1,TLR4,TWIST1,WNT5B                                                                      |
| Actin Nucleation by ARP-WASP Complex         | 3.29E+00 | ARPC1B,ARPC2,CDC42,ITGA4,ITGA5,MRAS,NCK1,NRAS,RAC2,RALB,RAP2B,RHOBTB1,RHOC,RND3,VASP,WASP,WIPF1                                                                                                                                  |
| CCR5 Signaling in Macrophages                | 3.24E+00 | CACNA1C,CALML5,CCL4,CCL5,CD247,CD3D,CD4,FAS,FER1G,GNG11,GNG7,JUN,MAPK11,MAPK12,MAPK14,MRAS,PRKCB,PRKCE,PRKCH,PRKD3                                                                                                               |
| Osteoarthritis Pathway                       | 3.23E+00 | ACVRL1,CASP1,CASP10,CASP4,CASP8,CEBPB,CXCR2,DIT4,DKK1,FGF2,FGF8,FN1,FRZB,FZD4,IL1B,IL1R1,IL1RL1,ITGA4,ITGA5,MEF2C,MMP3,NOTCH1,PGF,RELA,S100A8,S100A9,SMAD7,SMAD9,SOX9,TCF3,TGFB1,TGFBR2,TLR4,TNF,TNFRSF1B                        |
| Glioma Signaling                             | 3.20E+00 | CALML5,CAMK1,CAMK1D,CAMK1G,CCND1,CDKN2B,E2F3,IGF2,MRAS,NRAS,PDGFB,PDGFD,PDGFRA,PIK3C2B,PIK3R3,PRKCB,PRKCE,PRKCH,PRKD3,PTEN,RALB,RAP2B,TP53                                                                                       |
| VDR/RXR Activation                           | 3.15E+00 | CCL5,CD14,CEBPA,CEBPB,COL13A1,CSF2,CYP24A1,IGFBP5,IGFBP6,IL12A,IL1RL1,KLF4,PRKCB,PRKCE,PRKCH,PRKD3,RXRA,TGFB2,THBD                                                                                                               |
| Agrin Interactions at Neuromuscular Junction | 3.14E+00 | ACTA2,ACTC1,ARHGEF6,ARHGEF7,CDC42,ITGA4,ITGA5,ITGAL,ITGB2,JUN,LAMA2,MAPK12,MRAS,NRAS,RAC2,RALB,RAP2B,UTRN                                                                                                                        |
| Death Receptor Signaling                     | 3.11E+00 | ACTA2,ACTC1,ARHGDIB,CASP10,CASP8,FAS,GAS2,HSPB3,IKBKB,MAP3K14,MAP4K4,NFKBIE,PARP12,PARP8,RELA,TNF,TNFRSF10B,TNFRSF1B,TNFSF10,TNFSF12                                                                                             |
| Chemokine Signaling                          | 2.99E+00 | CALML5,CAMK1,CAMK1D,CAMK1G,CCL13,CCL2,CCL4,CCL5,CXCR4,JUN,MAPK11,MAPK12,MAPK14,MRAS,NRAS,PRKCB,RALB,RAP2B                                                                                                                        |
| Opioid Signaling Pathway                     | 2.98E+00 | ADCY1,ADCY3,AP2S1,ARRB1,ARRB2,BLK,CACNA1C,CALML5,CAMK1,CAMK1D,CAMK1G,CDC42,FGR,GNG11,GNG7,HCK,ITPR3,LCK,LYN,MAPK12,MRAS,MYC,NOS3,NRAS,PENK,PRKCB,PRKCE,PRKCH,PRKD3,RAC2,RALB,RAP2B,RGS16,RGS19,RGS3,RGS4,RPS6KA3,RPS6KB2,SIGMAR1 |
| Endothelin-1 Signaling                       | 2.96E+00 | ADCY1,ADCY3,CASP1,CASP10,CASP4,CASP8,EDNRA,GNA14,ITPR3,JUN,MAPK11,MAPK12,MAPK14,MRAS,MYC,NOS3,NRAS,PIK3C2B,PIK3R3,PLA2G4A,PLA2G4C,PLA2G7,PLAAT4,PRKCB,PRKCE,PRKCH,PRKD3,PTGS1,RALB,RAP2B                                         |

|                                                      |                                                                                                                                                                                                                                                                                                                                                           |
|------------------------------------------------------|-----------------------------------------------------------------------------------------------------------------------------------------------------------------------------------------------------------------------------------------------------------------------------------------------------------------------------------------------------------|
| Molecular Mechanisms of Cancer                       | 2.94E+00 ADCY1,ADCY3,ARHGEF15,ARHGEF2,ARHGEF6,ARHGEF7,BAK1,BAX,BRCA1,CASP10,CASP8,CCND1,CCNE2,CDC25C,CDC42,CDK1,CDK12,CDKN2B,E2F3,FAS,FZD4,GNA14,ITGA4,ITGA5,JUN,MAPK11,MAPK12,MAPK14,MAX,MRAS,MYC,NFKBIE,NOTCH1,NRAS,PIK3C2B,PIK3R3,PMAIP1,PRKCB,PRKCE,PRKCH,PRKD3,RAC2,RALB,RAP2B,RELA,RHOBTB1,RHOC,RND3,SMAD7,SMAD9,TCF3,TGFB1,TGFB2,TGFBR2,TP53,WNT5B |
| Thrombin Signaling                                   | 2.93E+00 ADCY1,ADCY3,ARHGEF15,ARHGEF2,ARHGEF6,CAMK1,CAMK1D,CAMK1G,CDC42,GATA2,GATA3,GNA14,GNG11,GNG7,IKBKB,ITPR3,MAPK11,MAPK12,MAPK14,MRAS,NRAS,PIK3C2B,PIK3R3,PRKCB,PRKCE,PRKCH,PRKD3,RAC2,RALB,RAP2B,RELA,RHOBTB1,RHOC,RND3                                                                                                                             |
| PI3K Signaling in B Lymphocytes                      | 2.90E+00 BLK,BTK,CALML5,CD180,CD40,CD79B,DAPP1,IKBKB,IL4R,INPP5D,ITPR3,JUN,LYN,MRAS,NFATC4,NFKBIE,NRAS,PRKCB,PTEN,PTPRC,RALB,RAP2B,RELA,TLR4,VAV1                                                                                                                                                                                                         |
| Gαq Signaling                                        | 2.85E+00 AGTR1,BTK,CALML5,CDC42,CSK,GNA14,GNG11,GNG7,GRM5,IKBKB,ITPR3,MRAS,NFATC4,NFKBIE,PIK3C2B,PIK3R3,PRKCB,PRKCE,PRKCH,PRKD3,RAC2,RELA,RGS16,RGS4,RHOBTB1,RHOC,RND3                                                                                                                                                                                    |
| Tumoricidal Function of Hepatic Natural Killer Cells | 2.82E+00 BAX,CASP8,FAS,GZMB,ICAM1,ITGAL,M6PR,PRF1,SRGN                                                                                                                                                                                                                                                                                                    |
| VEGF Family Ligand-Receptor Interactions             | 2.79E+00 FLT4,KDR,MRAS,NOS3,NRAS,NRP1,NRP2,PGF,PIK3C2B,PIK3R3,PLA2G4A,PLA2G4C,PRKCB,PRKCE,PRKCH,PRKD3,RALB,RAP2B                                                                                                                                                                                                                                          |
| Nur77 Signaling in T Lymphocytes                     | 2.75E+00 CALML5,CD247,CD3D,FCER1G,HDAC9,HLA-DMA,HLA-DMB,HLA-DOA,HLA-DQA1,HLA-DQB1,HLA-DRA,HLA-DRB1,RXRA                                                                                                                                                                                                                                                   |
| Role of Tissue Factor in Cancer                      | 2.75E+00 ARRB1,ARRB2,BLK,CDC42,CSF2,FGR,GNA14,HCK,IL1B,LCK,LYN,MAPK11,MAPK12,MAPK14,MRAS,NRAS,PIK3C2B,PIK3R3,PTEN,RALB,RAP2B,RPS6KA3,TP53                                                                                                                                                                                                                 |
| Sperm Motility                                       | 2.74E+00 BLK,BTK,CALML5,CNGA1,CSF1R,CSK,EPHB4,FES,FGR,FLT4,HCK,ITK,ITPR3,KDR,LCK,LTK,LYN,MAP3K11,MATK,MRAS,PDE2A,PDGFRA,PLA2G4A,PLA2G4C,PLA2G7,PLAAT4,PRKCB,PRKCE,PRKCH,PRKD3,RET,ROR2,TEK,TIE1                                                                                                                                                           |
| Macropinocytosis Signaling                           | 2.71E+00 CD14,CDC42,CSF1R,ITGA5,ITGB2,MRAS,NRAS,PDGFB,PDGFD,PIK3C2B,PIK3R3,PRKCB,PRKCE,PRKCH,PRKD3,RALB,RAP2B                                                                                                                                                                                                                                             |

|                                                                                                       |          |                                                                                                                                    |
|-------------------------------------------------------------------------------------------------------|----------|------------------------------------------------------------------------------------------------------------------------------------|
| HGF Signaling                                                                                         | 2.66E+00 | CCND1,CDC42,ELF4,ELK3,ETS1,ETS2,ITGA4,ITGA5,JUN,MAP3K11,MAP3K14,MAPK12,MRAS,NRAS,PIK3C2B,PIK3R3,PRKCB,PRKCE,PRKCH,PRKD3,RALB,RAP2B |
| IL-10 Signaling                                                                                       | 2.61E+00 | CD14,IKBKB,IL10RA,IL1B,IL1R1,IL1RL1,IL4R,JUN,MAP3K14,MAP4K4,MAPK11,MAPK12,MAPK14,NFKBIE,RELA,TNF                                   |
| Virus Entry via Endocytic Pathways                                                                    | 2.61E+00 | ACTA2,ACTC1,AP1S2,AP2S1,CDC42,HLA-E,ITGA4,ITGA5,ITGAL,ITGB2,MRAS,NRAS,PIK3C2B,PIK3R3,PRKCB,PRKCE,PRKCH,PRKD3,RAC2,RALB,RAP2B       |
| Regulation of IL-2 Expression in Activated and Anergic T Lymphocytes                                  | 2.61E+00 | CALML5,CD247,CD3D,IKBKB,JUN,LAT,MAPK12,MRAS,NFATC4,NFKBIE,NRAS,RALB,RAP2B,RELA,TGFB1,TGFB2,TGFBR2,VAV1                             |
| UVC-Induced MAPK Signaling                                                                            | 2.59E+00 | JUN,MAPK11,MAPK12,MAPK14,MRAS,NRAS,PRKCB,PRKCE,PRKCH,PRKD3,RALB,RAP2B,TP53                                                         |
| IL-15 Production                                                                                      | 2.56E+00 | BLK,BTK,CSF1R,CSK,EPHB4,FES,FGR,FLT4,HCK,IRF1,ITK,KDR,LCK,LTK,LYN,MAP3K11,MATK,PDGFRA,RELA,RET,ROR2,TEK,TIE1                       |
| IL-15 Signaling                                                                                       | 2.56E+00 | CSF2,IL15RA,IL2RB,IL2RG,LCK,MAPK11,MAPK12,MAPK14,MRAS,NRAS,PIK3C2B,PIK3R3,RALB,RAP2B,RELA,TNF                                      |
| MIF Regulation of Innate Immunity                                                                     | 2.55E+00 | CD14,CD74,JUN,LY96,MAPK12,NFKBIE,PLA2G4A,PLA2G4C,RELA,TLR4,TP53                                                                    |
| Mechanisms of Viral Exit from Host Cells                                                              | 2.55E+00 | ACTA2,ACTC1,LMNB1,LMNB2,NEDD4,PRKCB,PRKCE,PRKCH,PRKD3,SH3GL1,SH3GLB1                                                               |
| Inhibition of Angiogenesis by TSP1                                                                    | 2.50E+00 | HSPG2,JUN,KDR,MAPK11,MAPK12,MAPK14,NOS3,TGFB1,TGFBR2,TP53                                                                          |
| Differential Regulation of Cytokine Production in Macrophages and T Helper Cells by IL-17A and IL-17F | 2.49E+00 | CCL2,CCL4,CCL5,CSF2,IL12A,IL1B,TNF                                                                                                 |
| Renin-Angiotensin Signaling                                                                           | 2.47E+00 | ADCY1,ADCY3,AGTR1,CCL2,CCL5,ITPR3,JUN,MAPK11,MAPK12,MAPK14,MRAS,NRAS,PIK3C2B,PIK3R3,PRKCB,PRKCE,PRKCH,PRKD3,RALB,RAP2B,RELA,TNF    |
| Caveolar-mediated Endocytosis Signaling                                                               | 2.43E+00 | ACTA2,ACTC1,CAVIN1,CD48,FLOT1,FLOT2,HLA-E,ITGA10,ITGA4,ITGA5,ITGA8,ITGAL,ITGAM,ITGAX,ITGB2,PTPN1                                   |
| GM-CSF Signaling                                                                                      | 2.33E+00 | BCL2A1,CCND1,CSF2,ETS1,HCK,LYN,MRAS,NRAS,PIK3C2B,PIK3R3,PIM1,PRKCB,RALB,RAP2B,RUNX1                                                |
| Acute Myeloid Leukemia Signaling                                                                      | 2.33E+00 | CCND1,CEBPA,CSF1R,CSF3R,MRAS,MYC,NRAS,PIK3C2B,PIK3R3,PIM1,PML,RALB,RAP2B,RELA,RPS6KB2,RUNX1,SPI1,TCF3                              |

|                                                         |                                                                                                                                                                                                       |
|---------------------------------------------------------|-------------------------------------------------------------------------------------------------------------------------------------------------------------------------------------------------------|
| p38 MAPK Signaling                                      | 2.32E+00 FAS,HSPB3,IL1B,IL1R1,IL1RL1,MAPK11,MAPK12,MAPK14,MAX,MEF2C,MYC,PLA2G4A,PLA2G4C,RPS6KA3,RPS6KB2,TGFB1,TGFB2,TGFBR2,TNF,TNFRSF1B,TP53                                                          |
| Role of MAPK Signaling in the Pathogenesis of Influenza | 2.20E+00 BAX,CCL2,CCL5,MAPK11,MAPK12,MAPK14,MRAS,NRAS,PLA2G4A,PLA2G4C,PLA2G7,PLAAT4,RALB,RAP2B,TNF                                                                                                    |
| Complement System                                       | 2.20E+00 C1QA,C1QB,C2,C3AR1,C5AR1,CFD,ITGAM,ITGAX,ITGB2,MBL2                                                                                                                                          |
| CXCR4 Signaling                                         | 2.18E+00 ADCY1,ADCY3,CD4,CDC42,CXCR4,ELMO1,GNA14,GNG11,GNG7,ITPR3,JUN,LYN,MAPK12,MRAS,NRAS,PIK3C2B,PIK3R3,PRKCB,PRKCE,PRKCH,PRKD3,RAC2,RALB,RAP2B,RHOBTB1,RHOC,RND3                                   |
| PPAR Signaling                                          | 2.16E+00 IKBKB,IL1B,IL1R1,IL1RL1,JUN,MAP3K14,MAP4K4,MRAS,NFKBIE,NRAS,PDGFB,PDGFD,PDGFRA,RALB,RAP2B,RELA,RXRA,TNF,TNFRSF1B                                                                             |
| Germ Cell-Sertoli Cell Junction Signaling               | 2.11E+00 A2M,ACTA2,ACTC1,ACTN1,AFDN,CDC42,MAP3K11,MAP3K14,MAPK12,MAPK14,MRAS,NRAS,PIK3C2B,PIK3R3,RAC2,RALB,RAP2B,RHOBTB1,RHOC,RND3,SORBS1,TGFB1,TGFB2,TGFBR2,TNF,TUBA1A,TUBB6                         |
| Ephrin Receptor Signaling                               | 2.09E+00 ARHGEF15,ARPC1B,ARPC2,CDC42,CXCR4,EFNA1,EFNB3,EPHB4,GNA14,GNG11,GNG7,ITGA4,ITGA5,MAP3K14,MAP4K4,MRAS,NCK1,NRAS,PDGFB,PDGFD,PGF,RAC2,RALB,RAP2B,RGS3,SORBS1,WAS,WIPF1                         |
| Angiopoietin Signaling                                  | 2.08E+00 BIRC5,DOK2,IKKBK,MRAS,NCK1,NFKBIE,NOS3,NRAS,PIK3C2B,PIK3R3,RALB,RAP2B,RELA,TEK,TIE1                                                                                                          |
| CD40 Signaling                                          | 2.04E+00 CD40,ICAM1,IKKBK,JUN,MAP3K14,MAPK11,MAPK12,MAPK14,NFKBIE,PIK3C2B,PIK3R3,PTGS1,RELA,TNFAIP3                                                                                                   |
| Breast Cancer Regulation by Stathmin1                   | 2.04E+00 ADCY1,ADCY3,ARHGEF15,ARHGEF2,ARHGEF6,ARHGEF7,CALML5,CAMK1,CAMK1D,CAMK1G,CCNE2,CDC42,CDK1,E2F3,GNG11,GNG7,ITPR3,MRAS,NRAS,PIK3C2B,PIK3R3,PRKCB,PRKCE,PRKCH,PRKD3,RALB,RAP2B,TP53,TUBA1A,TUBB6 |
| IL-7 Signaling Pathway                                  | 2.02E+00 BAK1,BAX,BCL6,CCND1,IL2RG,IL7,JUN,LYN,MAPK11,MAPK12,MAPK14,MCL1,MYC,PIK3C2B,PIK3R3                                                                                                           |
| Reelin Signaling in Neurons                             | 2.02E+00 ARHGEF15,ARHGEF2,ARHGEF6,BLK,FGR,HCK,ITGA4,ITGA5,ITGAL,ITGB2,LCK,LYN,MAP3K11,MAPK12,PIK3C2B,PIK3R3                                                                                           |
| Prolactin Signaling                                     | 2.02E+00 CEBPB,IRF1,JUN,MRAS,MYC,NMI,NRAS,PIK3C2B,PIK3R3,PRKCB,PRKCE,PRKCH,PRKD3,RALB,RAP2B,SOCS2                                                                                                     |
| Sumoylation Pathway                                     | 2.02E+00 AR,ARHGDI, CDC42,CEBPA, DNMT3A,ETS1,FAS,ISG20,JUN,MAPK12,PML,RAC2,RFC2,RHOBTB1,RHOC,RND3,SP100,TP53,UBE2I                                                                                    |

|                                                                                                    |          |                                                                                                                                                                                                    |
|----------------------------------------------------------------------------------------------------|----------|----------------------------------------------------------------------------------------------------------------------------------------------------------------------------------------------------|
| Actin Cytoskeleton Signaling                                                                       | 1.99E+00 | ACTA2,ACTC1,ACTN1,ARHGEF6,ARHGEF7,ARPC1B,ARPC2,CD14,CDC42,CSK,FGD1,FGF2,FGF8,FN1,ITGA4,ITGA5,MATK,MRAS,MYH11,NCKAP1L,NRAS,PDGFB,PDGFD,PFN1,PIK3C2B,PIK3R3,RAC2,RALB,RAP2B,TMSB10/TMSB4X,VAV1,WAS   |
| Role of NFAT in Cardiac Hypertrophy                                                                | 1.99E+00 | ADCY1,ADCY3,CACNA1C,CALML5,CAMK1,CAMK1D,CAMK1G,GNG11,GNG7,HDAC7,HDAC9,ITPR3,MAPK11,MAPK12,MAPK14,MEF2C,MRAS,NFATC4,NRAS,PIK3C2B,PIK3R3,PRKCB,PRKCE,PRKCH,PRKD3,RALB,RAP2B,RCAN2,TGFB1,TGFB2,TGFBR2 |
| UVB-Induced MAPK Signaling                                                                         | 1.99E+00 | JUN,MAPK11,MAPK12,MAPK14,PIK3C2B,PIK3R3,PRKCB,PRKCE,PRKCH,PRKD3,RPS6KA3,TP53                                                                                                                       |
| PAK Signaling                                                                                      | 1.98E+00 | ARHGEF6,ARHGEF7,CDC42,ITGA4,ITGA5,MAPK12,MRAS,NCK1,NRAS,PAK1IP1,PDGFB,PDGFD,PDGFRA,PIK3C2B,PIK3R3,RALB,RAP2B,TNF                                                                                   |
| Epithelial Adherens Junction Signaling                                                             | 1.98E+00 | ACTA2,ACTC1,ACTN1,AFDN,ARPC1B,ARPC2,CDC42,MRAS,MYH11,NOTCH1,NOTCH3,NOTCH4,NRAS,PTEN,PTPRM,RALB,RAP2B,SNAI2,SORBS1,TCF3,TGFB2,TGFBR2,TUBA1A,TUBB6,WAS                                               |
| PEDF Signaling                                                                                     | 1.98E+00 | CASP8,FAS,IKBKB,MAPK11,MAPK12,MAPK14,MRAS,NFKBIE,NRAS,PIK3C2B,PIK3R3,RALB,RAP2B,RELA,SOD2,TP53                                                                                                     |
| Differential Regulation of Cytokine Production in Intestinal Epithelial Cells by IL-17A and IL-17F | 1.96E+00 | CCL2,CCL4,CCL5,CSF2,IL12A,IL1B,TNF                                                                                                                                                                 |
| SAPK/JNK Signaling                                                                                 | 1.94E+00 | CDC42,FCER1G,GNG11,GNG7,JUN,LCK,MAP3K11,MAP4K4,MAPK12,MINK1,MRAS,NRAS,PIK3C2B,PIK3R3,RAC2,RALB,RAP2B,TP53                                                                                          |
| HER-2 Signaling in Breast Cancer                                                                   | 1.94E+00 | CCND1,CCNE2,CDC42,ITGB2,MMP2,MRAS,NRAS,PIK3C2B,PIK3R3,PRKCB,PRKCE,PRKCH,PRKD3,RALB,RAP2B,TP53                                                                                                      |
| Cholecystokinin/Gastrin-mediated Signaling                                                         | 1.92E+00 | CDC42,IL1B,ITPR3,JUN,MAPK12,MAPK14,MEF2C,MRAS,NRAS,PRKCB,PRKCE,PRKCH,PRKD3,RAC2,RALB,RAP2B,RHOBTB1,RHOC,RND3,TNF                                                                                   |
| Role of Osteoblasts, Osteoclasts and Chondrocytes in Rheumatoid Arthritis                          | 1.91E+00 | CALML5,COL1A1,CSF1R,CSF2,CTSK,DKK1,DKK3,FRZB,FZD4,IKBKB,IL1B,IL1R1,IL1RL1,IL7,ITGA5,JUN,MAP3K14,MAPK12,MAPK14,MMP3,MMP8,NFATC4,NFKBIE,PIK3C2B,PIK3R3,RELA,SMAD9,TCF3,TGFB1,TNF,TNFRSF1B,WNT5B      |
| p53 Signaling                                                                                      | 1.90E+00 | BAX,BIRC5,BRCA1,CCND1,FAS,HDAC9,JUN,MAPK14,PIK3C2B,PIK3R3,PMAIP1,PML,PPP1R13B,PTEN,SCO2,SNAI2,TNFRSF10B,TP53                                                                                       |

|                                                              |                                                                                                                                                                      |
|--------------------------------------------------------------|----------------------------------------------------------------------------------------------------------------------------------------------------------------------|
| Glioma Invasiveness Signaling                                | 1.90E+00 CD44,CDC42,MMP2,MRAS,NRAS,PIK3C2B,PIK3R3,PLAU,RAC2,RALB,RAP2B,RHOBTB1,RHOC,RND3                                                                             |
| Wnt/ $\beta$ -catenin Signaling                              | 1.90E+00 CCND1,CD44,CDH5,DKK1,DKK3,FRZB,FZD4,JUN,MYC,NR5A2,RARB,RARG,SOX11,SOX13,SOX17,SOX18,SOX4,SOX9,TCF3,TGFB1,TGFB2,TGFBR2,TLE1,TLE3,TP53,WNT5B                  |
| IL-17A Signaling in Fibroblasts                              | 1.90E+00 CCL2,CEBPB,IKBKB,JUN,MAPK11,MAPK12,MAPK14,NFKBIE,RELA                                                                                                       |
| Induction of Apoptosis by HIV1                               | 1.86E+00 BAK1,BAX,CASP8,CXCR4,FAS,IKBKB,MAP3K14,MAPK12,NFKBIE,RELA,TNF,TNFRSF1B,TP53                                                                                 |
| Role of PKR in Interferon Induction and Antiviral Response   | 1.83E+00 CASP8,EIF2AK2,EIF2S1,IKBKB,IRF1,MAPK14,NFKBIE,RELA,TNF,TP53                                                                                                 |
| Cytotoxic T Lymphocyte-mediated Apoptosis of Target Cells    | 1.83E+00 CASP8,CD247,CD3D,FAS,FCER1G,GZMB,HLA-E,PRF1                                                                                                                 |
| TNFR2 Signaling                                              | 1.83E+00 IKBKB,JUN,MAP3K14,NFKBIE,RELA,TNF,TNFAIP3,TNFRSF1B                                                                                                          |
| Activation of IRF by Cytosolic Pattern Recognition Receptors | 1.81E+00 CD40,IFIH1,IFIT2,IKBKB,IRF7,IRF9,ISG15,JUN,MAPK12,NFKBIE,RELA,TNF,ZBP1                                                                                      |
| FAK Signaling                                                | 1.81E+00 ACTA2,ACTC1,ARHGAP26,ARHGEF6,ARHGEF7,ASAP1,CSK,ITGA4,ITGA5,MRAS,NRAS,PIK3C2B,PIK3R3,PTEN,RALB,RAP2B,WAS                                                     |
| Sertoli Cell-Sertoli Cell Junction Signaling                 | 1.81E+00 A2M,ACTA2,ACTC1,ACTN1,AFDN,CDC42,EPB41,ITGA4,ITGA5,JAM2,JUN,MAP3K11,MAP3K14,MAPK11,MAPK12,MAPK14,MRAS,NOS3,NRAS,PTEN,RALB,RAP2B,SORBS1,TNF,TUBA1A,TUBB6,WAS |
| Airway Pathology in Chronic Obstructive Pulmonary Disease    | 1.80E+00 CXCL3,MMP2,MMP8,TNF                                                                                                                                         |
| Sphingosine-1-phosphate Signaling                            | 1.79E+00 ADCY1,ADCY3,CASP1,CASP10,CASP4,CASP8,CDC42,PDGFB,PDGFD,PDGFRA,PIK3C2B,PIK3R3,RAC2,RHOBTB1,RHOC,RND3,S1PR1,S1PR4                                             |
| Mouse Embryonic Stem Cell Pluripotency                       | 1.79E+00 FZD4,ID1,ID2,ID3,LIFR,MAPK11,MAPK12,MAPK14,MRAS,MYC,NRAS,PIK3C2B,PIK3R3,RALB,RAP2B,SMAD9,TCF3,TP53                                                          |
| HIF1 $\alpha$ Signaling                                      | 1.76E+00 JUN,LDHA,MAPK11,MAPK12,MAPK14,MMP2,MMP3,MMP8,MRAS,NAA10,NOS3,NRAS,PGF,PIK3C2B,PIK3R3,RALB,RAP2B,SLC2A3,TP53                                                 |
| Coagulation System                                           | 1.76E+00 A2M,F12,F8,PLAT,PLAU,SERPINA1,TFPI,THBD,VWF                                                                                                                 |
| IL-17 Signaling                                              | 1.76E+00 CCL2,CEBPB,JUN,MAP3K14,MAPK11,MAPK12,MAPK14,MMP3,MRAS,NRAS,PIK3C2B,PIK3R3,RALB,RAP2B,RELA                                                                   |



|                                        |          |                                                                                                                                                                                                            |
|----------------------------------------|----------|------------------------------------------------------------------------------------------------------------------------------------------------------------------------------------------------------------|
| Small Cell Lung Cancer Signaling       | 1.76E+00 | CCND1,CCNE2,CDKN2B,IKBKB,MAX,MYC,NFKBIE,PIK3C2B,PIK3R3,PTEN,RARB,RELA,RXRA,TP53                                                                                                                            |
| MIF-mediated Glucocorticoid Regulation | 1.76E+00 | CD14,CD74,LY96,NFKBIE,PLA2G4A,PLA2G4C,RELA,TLR4                                                                                                                                                            |
| MSP-ROn Signaling Pathway              | 1.72E+00 | ACTA2,ACTC1,CCL2,CCR2,F12,IL12A,ITGAM,ITGB2,PIK3C2B,PIK3R3,TLR4,TNF                                                                                                                                        |
| Apelin Liver Signaling Pathway         | 1.68E+00 | APLNR,COL11A2,COL1A1,COL1A2,FAS,MAPK12,TNF                                                                                                                                                                 |
| Glioblastoma Multiforme Signaling      | 1.67E+00 | CCND1,CDC42,E2F3,FZD4,IGF2,ITPR3,MRAS,MYC,NRAS,PDGFB,PDGFD,PDGFRA,PIK3C2B,PIK3R3,PTEN,RAC2,RALB,RAP2B,RHOBTB1,RHOC,RND3,TCF3,TP53,WNT5B                                                                    |
| IL-1 Signaling                         | 1.63E+00 | ADCY1,ADCY3,GNA14,GNG11,GNG7,IKBKB,IL1R1,JUN,MAP3K14,MAPK11,MAPK12,MAPK14,MRAS,MYD88,NFKBIE,RELA                                                                                                           |
| Adipogenesis pathway                   | 1.63E+00 | ATG7,CEBPA,CEBPB,EGR2,EZH2,FABP4,FGF2,FZD4,GTF2H5,HDAC7,HDAC9,KLF3,NFATC4,RBBP4,RBP1,SAP30,SMAD9,SOX9,TGFB1,TNF,TP53                                                                                       |
| B Cell Activating Factor Signaling     | 1.62E+00 | IKBKB,JUN,MAP3K14,MAPK11,MAPK12,MAPK14,NFATC4,NFKBIE,RELA                                                                                                                                                  |
| CCR3 Signaling in Eosinophils          | 1.62E+00 | CALML5,GNG11,GNG7,ITPR3,MAPK11,MAPK12,MAPK14,MRAS,NRAS,PIK3C2B,PIK3R3,PLA2G4A,PLA2G4C,PRKCB,PRKCE,PRKCH,PRKD3,RALB,RAP2B                                                                                   |
| April Mediated Signaling               | 1.62E+00 | IKBKB,JUN,MAP3K14,MAPK11,MAPK12,MAPK14,NFATC4,NFKBIE,RELA                                                                                                                                                  |
| Signaling by Rho Family GTPases        | 1.62E+00 | ACTA2,ACTC1,ARHGEF15,ARHGEF2,ARHGEF6,ARHGEF7,ARPC1B,ARPC2,CDC42,CDH11,CDH13,CDH5,CYBB,GNA14,GNG11,GNG7,ITGA4,ITGA5,JUN,MAP3K11,MAPK12,MRAS,NCF2,NEDD4,PIK3C2B,PIK3R3,RAC2,RELA,RHOBTB1,RHOC,RND3,WAS,WIPF1 |
| RhoGDI Signaling                       | 1.62E+00 | ACTA2,ACTC1,ARHGAP4,ARHGDI,ARHGEF15,ARHGEF2,ARHGEF6,ARHGEF7,ARPC1B,ARPC2,CD44,CDC42,CDH11,CDH13,CDH5,DGKZ,GNA14,GNG11,GNG7,ITGA4,ITGA5,MRAS,RAC2,RHOBTB1,RHOC,RND3                                         |
| 4-1BB Signaling in T Lymphocytes       | 1.60E+00 | IKBKB,JUN,MAP3K14,MAPK11,MAPK12,MAPK14,NFKBIE,RELA                                                                                                                                                         |
| IL-17A Signaling in Gastric Cells      | 1.60E+00 | CCL5,JUN,MAPK11,MAPK12,MAPK14,RELA,TNF                                                                                                                                                                     |
| GNRH Signaling                         | 1.59E+00 | ADCY1,ADCY3,CACNA1C,CALML5,CDC42,GNA14,GNG11,GNG7,ITPR3,JUN,MAP3K11,MAP3K14,MAPK11,MAPK12,MAPK14,MMP2,MRAS,NRAS,PRKCB,PRKCE,PRKCH,PRKD3,RALB,RAP2B,RELA                                                    |

|                                    |          |                                                                                                                                                                                                                                                     |
|------------------------------------|----------|-----------------------------------------------------------------------------------------------------------------------------------------------------------------------------------------------------------------------------------------------------|
| Chronic Myeloid Leukemia Signaling | 1.59E+00 | CCND1,E2F3,HDAC7,HDAC9,IKBKB,MRAS,MYC,NRAS,PIK3C2B,PIK3R3,RALB,RAP2B,RELA,TGFB1,TGFB2,TGFB2,TP53                                                                                                                                                    |
| ErbB Signaling                     | 1.57E+00 | CDC42,JUN,MAPK11,MAPK12,MAPK14,MRAS,NCK1,NRAS,PIK3C2B,PIK3R3,PRKCB,PRKCE,PRKCH,PRKD3,RALB,RAP2B                                                                                                                                                     |
| Adrenomedullin signaling pathway   | 1.57E+00 | ADCY1,ADCY3,BAX,CALCRL,CALML5,CEBPB,CSK,GNA14,IL1B,ITPR3,MAPK11,MAPK12,MAPK14,MATK,MAX,MMP2,MRAS,NOS3,NRAS,PIK3C2B,PIK3R3,RALB,RAMP2,RAP2B,RELA,RXRA,TNF                                                                                            |
| Telomerase Signaling               | 1.55E+00 | ELF4,ELK3,ETS1,ETS2,HDAC7,HDAC9,IL2RB,IL2RG,MRAS,MYC,NRAS,PIK3C2B,PIK3R3,RALB,RAP2B,TINF2,TP53                                                                                                                                                      |
| 3-phosphoinositide Degradation     | 1.55E+00 | CDC25C,DOT1L,DUSP11,DUSP2,DUSP5,INPP4B,INPP5D,INPP5K,NUDT1,NUDT11,NUDT3,PPFIA3,PPP1R13B,PTEN,PTPN1,PTPRC,PTPRH,PTPRM,STYXL1,TPTE                                                                                                                    |
| PTEN Signaling                     | 1.55E+00 | CCND1,CDC42,FLT4,IKBKB,INPP5D,INPP5K,ITGA5,KDR,MRAS,NRAS,PDGFRA,PIK3R3,PTEN,RAC2,RALB,RAP2B,RELA,RPS6KB2,TGFBR2                                                                                                                                     |
| Thrombopoietin Signaling           | 1.52E+00 | JUN,MRAS,MYC,NRAS,PIK3C2B,PIK3R3,PRKCB,PRKCE,PRKCH,PRKD3,RALB,RAP2B                                                                                                                                                                                 |
| Gα12/13 Signaling                  | 1.52E+00 | BTK,CDC42,CDH11,CDH13,CDH5,IKBKB,JUN,LPAR6,MAPK12,MEF2C,MRAS,NFKBIE,NRAS,PIK3C2B,PIK3R3,RALB,RAP2B,RELA,TBXA2R,VAV1                                                                                                                                 |
| Glucocorticoid Receptor Signaling  | 1.50E+00 | A2M,ADRB2,AR,CCL13,CCL2,CCL5,CD163,CD247,CD3D,CEBPA,CEBPB,CSF2,CXCL3,GTF2H5,ICAM1,IKBKB,IL1B,JUN,KRT17,MAP3K14,MAPK11,MAPK12,MAPK14,MRAS,NFATC4,NFKBIE,NRAS,PBX1,PIK3C2B,PIK3R3,PLAU,POLR2D,RALB,RAP2B,RELA,TAF12,TGFB1,TGFB2,TGFB2,TNF,UBE2I,VIPR1 |
| RAR Activation                     | 1.49E+00 | ADCY1,ADCY3,AKR1B10,CSK,GTF2H5,JUN,MAPK11,MAPK12,MAPK14,PIK3R3,PML,PRKCB,PRKCE,PRKCH,PRKD3,PTEN,RARB,RARG,RBP1,RBP3,RELA,RXRA,SMAD7,SMAD9,TGFB1,TGFB2,TRIM24                                                                                        |
| Thyroid Cancer Signaling           | 1.48E+00 | CCND1,MRAS,MYC,NRAS,RALB,RAP2B,RET,RXRA,TCF3,TP53                                                                                                                                                                                                   |
| Myc Mediated Apoptosis Signaling   | 1.48E+00 | BAX,CASP8,FAS,MAPK12,MRAS,MYC,NRAS,PIK3C2B,PIK3R3,RALB,RAP2B,TP53                                                                                                                                                                                   |
| PDGF Signaling                     | 1.48E+00 | EIF2AK2,INPP5D,INPP5K,JUN,MRAS,MYC,NRAS,PDGFRB,PDGFRD,PDGFRA,PIK3C2B,PIK3R3,PRKCB,RALB,RAP2B                                                                                                                                                        |

|                                                                            |          |                                                                                                                                                                                                                                                                                                                                |
|----------------------------------------------------------------------------|----------|--------------------------------------------------------------------------------------------------------------------------------------------------------------------------------------------------------------------------------------------------------------------------------------------------------------------------------|
| Systemic Lupus Erythematosus Signaling                                     | 1.46E+00 | CD247,CD3D,CD40,CD79B,FCER1G,FCGR3A/FCGR3B,HLA-E,IL1B,INPP5D,JUN,LAT,LCK,LSM7,LYN,MRAS,NFATC4,NRAS,PIK3C2B,PIK3R3,PRPF38B,PTPRC,RALB,RAP2B,SNRNP40,TLR7,TNF                                                                                                                                                                    |
| Superpathway of Inositol Phosphate Compounds                               | 1.46E+00 | CDC25C,DOT1L,DUSP11,DUSP2,DUSP5,INPP5A,INPP5D,INPP5K,ITPKB,NUDT1,NUDT11,NUDT3,PIK3C2B,PIK3R3,PIP4K2A,PPFIA3,PPP1R13B,PTEN,PTPN1,PTPRC,PTPRH,PTPRM,STYXL1,TPTE                                                                                                                                                                  |
| TGF- $\beta$ Signaling                                                     | 1.46E+00 | CDC42,IRF7,JUN,MAPK11,MAPK12,MAPK14,MRAS,NRAS,RALB,RAP2B,RUNX3,SMAD7,SMAD9,TGFB1,TGFB2,TGFBR2                                                                                                                                                                                                                                  |
| Regulation of the Epithelial-Mesenchymal Transition Pathway                | 1.44E+00 | ETS1,FGF2,FGF8,FZD4,HMGA2,ID2,JAG2,MMP2,MRAS,NOTCH1,NOTCH3,NOTCH4,NRAS,PDGFD,PIK3C2B,PIK3R3,RALB,RAP2B,RELA,SNAI2,TCF3,TGFB1,TGFB2,TGFBR2,TWIST1,WNT5B                                                                                                                                                                         |
| Nitric Oxide Signaling in the Cardiovascular System                        | 1.42E+00 | ATP2A3,CACNA1C,CALML5,FLT4,ITPR3,KDR,NOS3,PDE2A,PDE5A,PGF,PIK3C2B,PIK3R3,PRKCB,PRKCE,PRKCH,PRKD3                                                                                                                                                                                                                               |
| Role of JAK1 and JAK3 in $\text{C}\epsilon\geq\text{c}$ Cytokine Signaling | 1.39E+00 | FES,IL15RA,IL2RB,IL2RG,IL4R,IL7,MRAS,NRAS,PIK3C2B,PIK3R3,RALB,RAP2B                                                                                                                                                                                                                                                            |
| Cell Cycle: G1/S Checkpoint Regulation                                     | 1.39E+00 | CCND1,CCNE2,CDKN2B,E2F3,HDAC7,HDAC9,MAX,MYC,PAK1IP1,TGFB1,TGFB2,TP53                                                                                                                                                                                                                                                           |
| Granzyme B Signaling                                                       | 1.39E+00 | CASP8,GZMB,LMNB1,LMNB2,PRF1                                                                                                                                                                                                                                                                                                    |
| VEGF Signaling                                                             | 1.39E+00 | ACTA2,ACTC1,ACTN1,EIF2B4,EIF2S1,FLT4,KDR,MRAS,NOS3,NRAS,PGF,PIK3C2B,PIK3R3,PRKCB,RALB,RAP2B                                                                                                                                                                                                                                    |
| Axonal Guidance Signaling                                                  | 1.38E+00 | ADAM12,ADAM15,ADAMTS1,ARHGEF15,ARHGEF6,ARHGEF7,ARPC1B,ARPC2,CDC42,CXCR4,EFNA1,EFNB3,EPHB4,FES,FZD4,GNA14,GNG11,GNG7,ITGA4,ITGA5, MMP2,MMP3,MMP8,MRAS,NCK1,NFATC4,NRAS,NRP1,NRP2,PDGFB,PDGFD,PFN1,PGF,PIK3C2B,PIK3R3,PLXNB3,PRKCB,PRKCE,PRKCH,PRKD3,RAC2,RALB,RAP2B,RGS3,SEMA3F,SEMA4C,SEMA6A,TUBA1A,TUBB6,VASP,WAS,WIPF1,WNT5B |
| $\beta$ -Adrenergic Signaling                                              | 1.37E+00 | ADCY1,ADCY3,CALML5,GNG11,GNG7,ITPR3,MRAS,NRAS,PRKCB,PRKCE,PRKCH,PRKD3,PYGL,RALB,RAP2B                                                                                                                                                                                                                                          |
| GDNF Family Ligand-Receptor Interactions                                   | 1.37E+00 | CDC42,DOK2,ITPR3,JUN,MAPK12,MRAS,NCK1,NRAS,PIK3C2B,PIK3R3,RALB,RAP2B,RET                                                                                                                                                                                                                                                       |
| Superpathway of D-myo-inositol (1,4,5)-trisphosphate Metabolism            | 1.37E+00 | INPP1,INPP5A,INPP5D,INPP5K,ITPKB,PTEN                                                                                                                                                                                                                                                                                          |

|                                                   |                                                                                                                                                                                                             |
|---------------------------------------------------|-------------------------------------------------------------------------------------------------------------------------------------------------------------------------------------------------------------|
| UVA-Induced MAPK Signaling                        | 1.37E+00 JUN,MAPK11,MAPK12,MAPK14,MRAS,NRAS,PARP12,PARP8,PIK3C2B,PIK3R3,RALB,RAP2B,RPS6KA3,RPS6KB2,TP53                                                                                                     |
| Rac Signaling                                     | 1.35E+00 ARPC1B,ARPC2,CD44,CDC42,CYBB,ITGA4,ITGA5,JUN,MAP3K11,MRAS,NCF2,NRAS,PIK3C2B,PIK3R3,RALB,RAP2B,RELA                                                                                                 |
| Hematopoiesis from Pluripotent Stem Cells         | 1.35E+00 CD247,CD3D,CD4,CD8A,CSF2,FCER1G,IL12A,IL7                                                                                                                                                          |
| Leukotriene Biosynthesis                          | 1.35E+00 DPEP2,GGT5,LTC4S,MGST2                                                                                                                                                                             |
| Erythropoietin Signaling                          | 1.33E+00 JUN,MRAS,NFKBIE,NRAS,PIK3C2B,PIK3R3,PRKCB,PRKE,PRKCH,PRKD3,RALB,RAP2B,RELA                                                                                                                         |
| Cardiac Hypertrophy Signaling                     | 1.33E+00 ADCY1,ADCY3,ADRB2,CACNA1C,CALML5,CDC42,EIF2B4,GNA14,GNG11,GNG7,JUN,MAP3K11,MAP3K14,MAPK11,MAPK12,MAPK14,MEF2C,MRAS,NFATC4,NRAS,PIK3C2B,PIK3R3,RAC2,RALB,RAP2B,RHOBTB1,RHOC,RND3,TGFB1,TGFB2,TGFBR2 |
| Neuregulin Signaling                              | 1.30E+00 ITGA4,ITGA5,MATK,MRAS,MYC,NRAS,PIK3R3,PRKCB,PRKCE,PRKCH,PRKD3,PTEN,RALB,RAP2B,RPS6KB2                                                                                                              |
| D-myo-inositol (1,3,4)-trisphosphate Biosynthesis | 1.30E+00 INPP5A,INPP5D,INPP5K,ITPKB,PTEN                                                                                                                                                                    |
| Th17 Activation Pathway                           | 1.30E+00 CCR6,CSF2,FCER1G,IL12A,IL12RB1,IL1B,IL1R1,MYD88,NFATC4,RELA,RUNX1                                                                                                                                  |

**Supplemental Table S7:** Clinical and morphometric measures for the participants who contributed single-cell expression data from kidney biopsies

| Characteristic                                                            | N  |               |
|---------------------------------------------------------------------------|----|---------------|
| Male sex (%)                                                              | 44 | 14 (31.8%)    |
| Age (years)                                                               | 44 | 41.0 ± 11.1   |
| Diabetes duration (years)                                                 | 44 | 12.2 ± 7.5    |
| BMI (kg/m <sup>2</sup> )                                                  | 44 | 36.9 ± 7.3    |
| Systolic blood pressure (mmHg)                                            | 44 | 119 ± 12      |
| Diastolic blood pressure (mmHg)                                           | 44 | 72 ± 10       |
| HbA1c (%) *                                                               | 42 | 9.2 ± 2.4     |
| GFR (ml/min)                                                              | 44 | 159 ± 58      |
| ACR (mg/g)                                                                | 44 | 18 (9-48)     |
| RAS use (%)                                                               | 44 | 19 (43.2%)    |
| Mean glomerular volume (10 <sup>6</sup> μm <sup>3</sup> )                 | 38 | 2.55 ± 1.06   |
| Glomerular basement membrane width (nm)                                   | 41 | 457 ± 103     |
| Mesangial fractional volume per glomerulus (%)                            | 41 | 0.23 ± 0.07   |
| Cortical interstitial fractional volume (%)                               | 35 | 0.18 ± 0.06   |
| Glomerular filtration surface density (μm <sup>2</sup> /μm <sup>3</sup> ) | 41 | 0.09 ± 0.02   |
| Foot process width (nm)                                                   | 39 | 491 (422-572) |
| Glomerular podocyte fractional volume (%)                                 | 41 | 0.18 ± 0.03   |
| Podocyte number density per glomerulus (10 <sup>6</sup> μm <sup>3</sup> ) | 41 | 157 ± 98      |
| Fenestrated endothelium (%)                                               | 39 | 47.4 ± 16.1   |

Values are means ± standard deviation or median (interquartile range).

Abbreviations: ACR = albumin:creatinine ratio; BMI = body mass index; GBM = glomerular basement membrane; GFR = glomerular filtration rate; RAS = renin angiotensin system blockers.

**Supplemental Figure S1:** Individual time-course plots of measured glomerular filtration rate (GFR) for study participants by time from kidney biopsy A) where GFR peak was within 2 years of kidney biopsy and B) where GFR peak was greater than 2 years after kidney biopsy

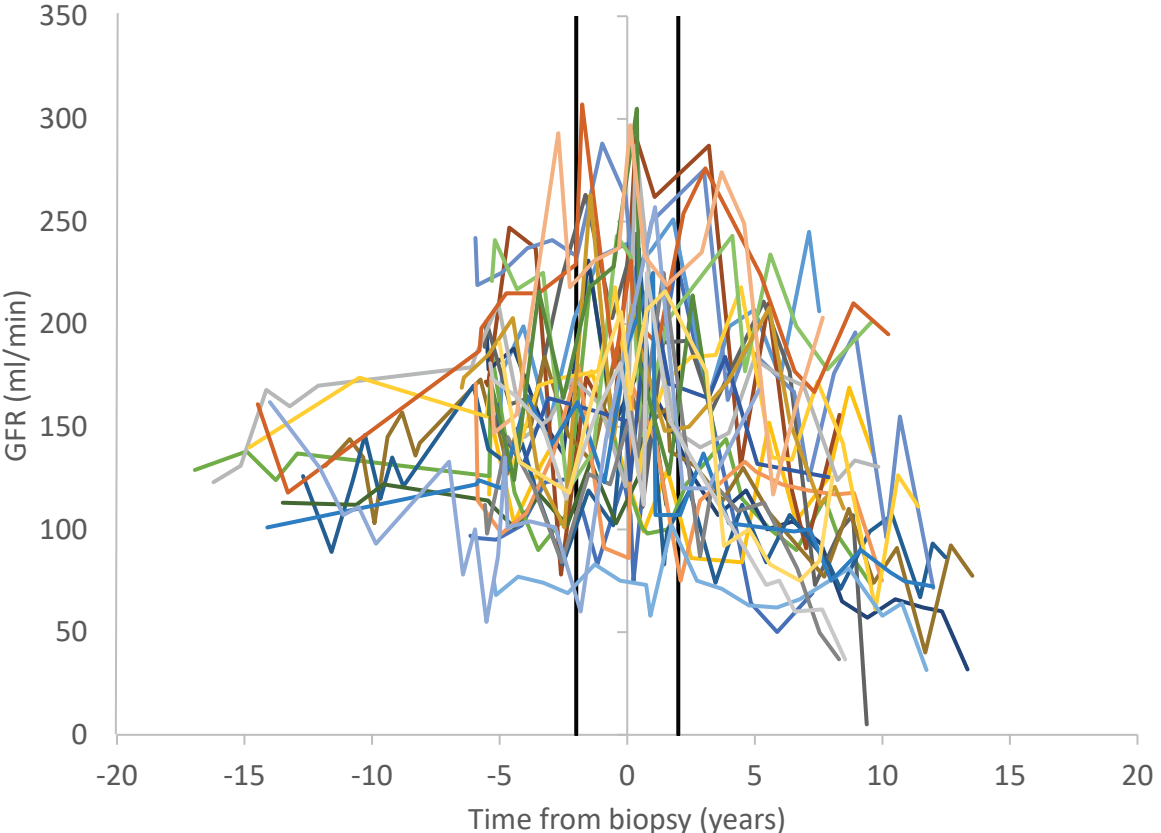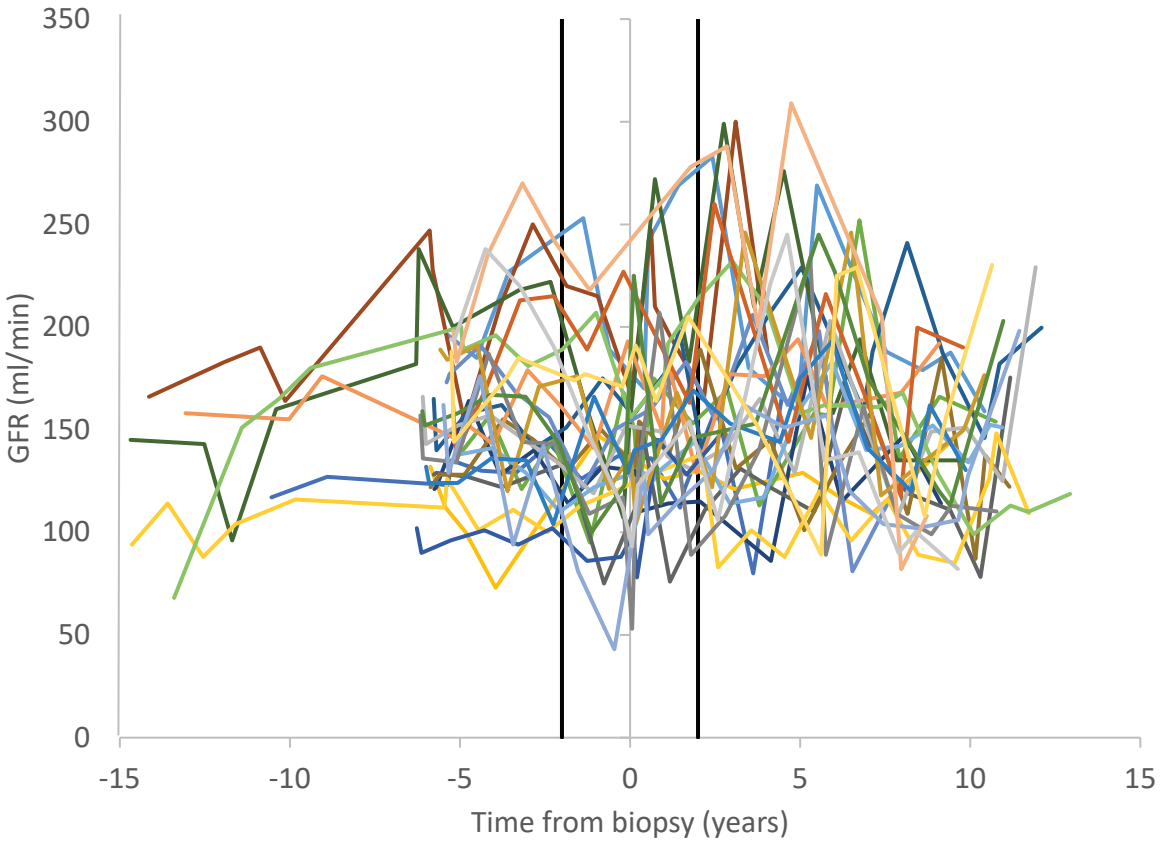

# Supplemental Figure S2: Top 30 interconnected genes in HF associated modules

## A. Salmon module

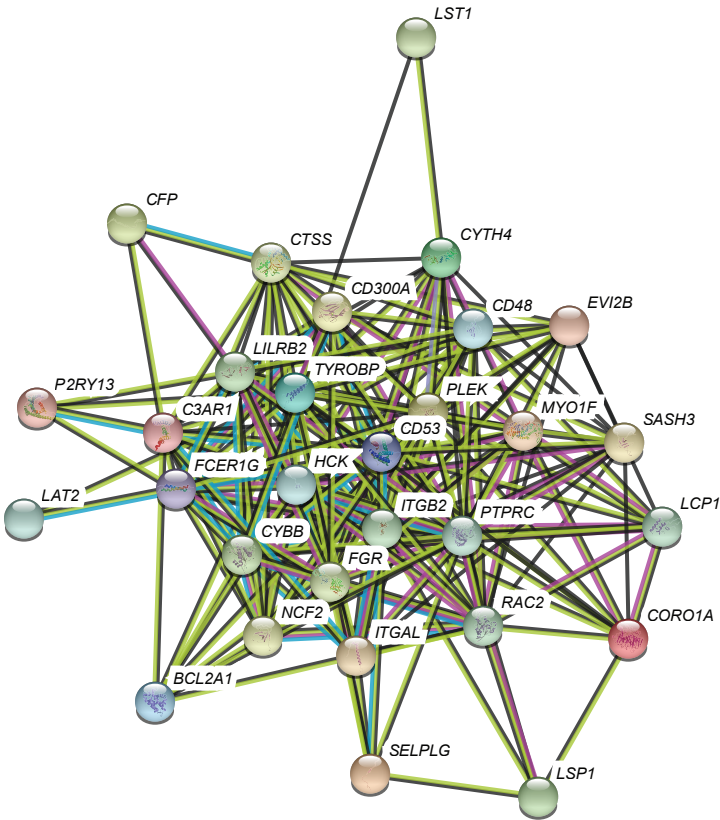

## B. Midnight Blue module

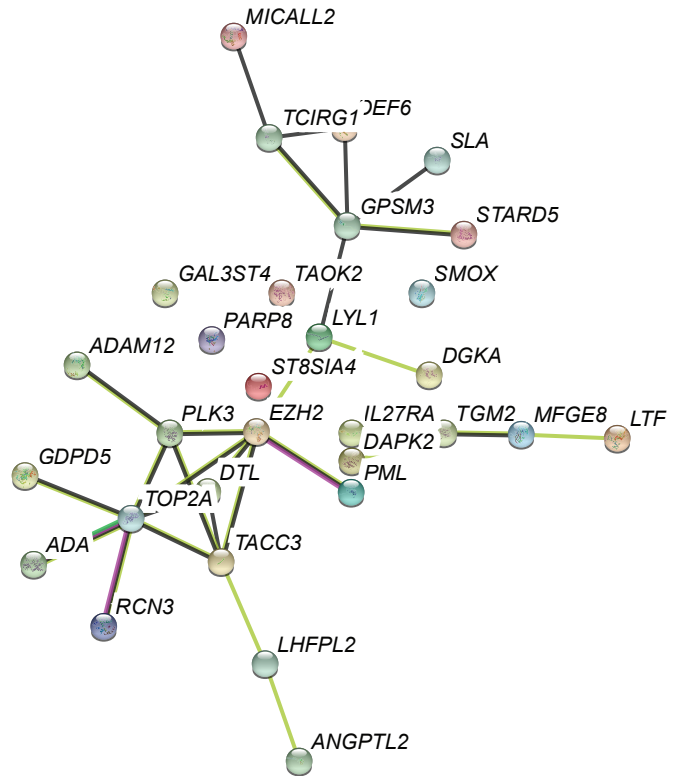

## C. Red module

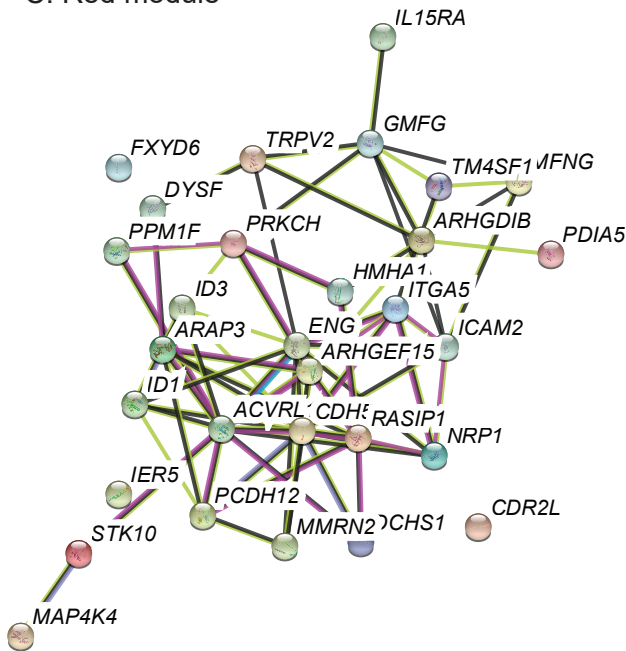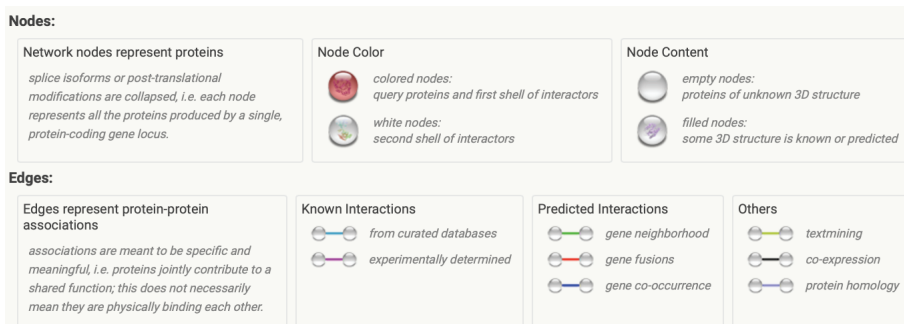





**Supplemental Figure S4:** Hub genes in youth onset T2D (n=6) and healthy controls (n=6). A dot plot showing significantly enriched hubgenes selected from the 3 hyperfiltration modules in T2D endothelial cells (T2D) compared to endothelial cell in healthy controls (HC). The dot size represents the percentage of cells expressing the gene in the respective clusters and the color represent the intensity of the expression level from grey (low) to blue (high)

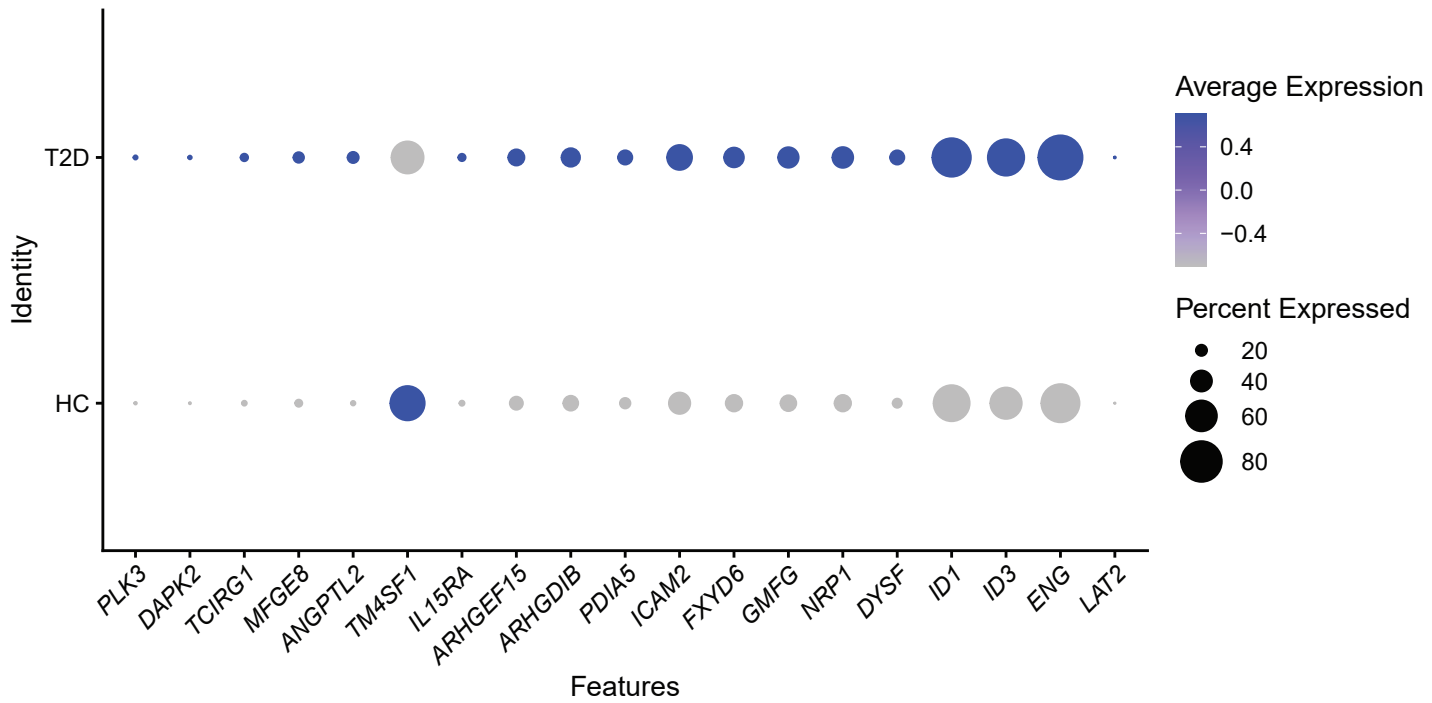

**Supplemental Figure S5.** NicheNet predicted intracellular targets of endothelial cell activated ligands in crosstalk with mesangial cells

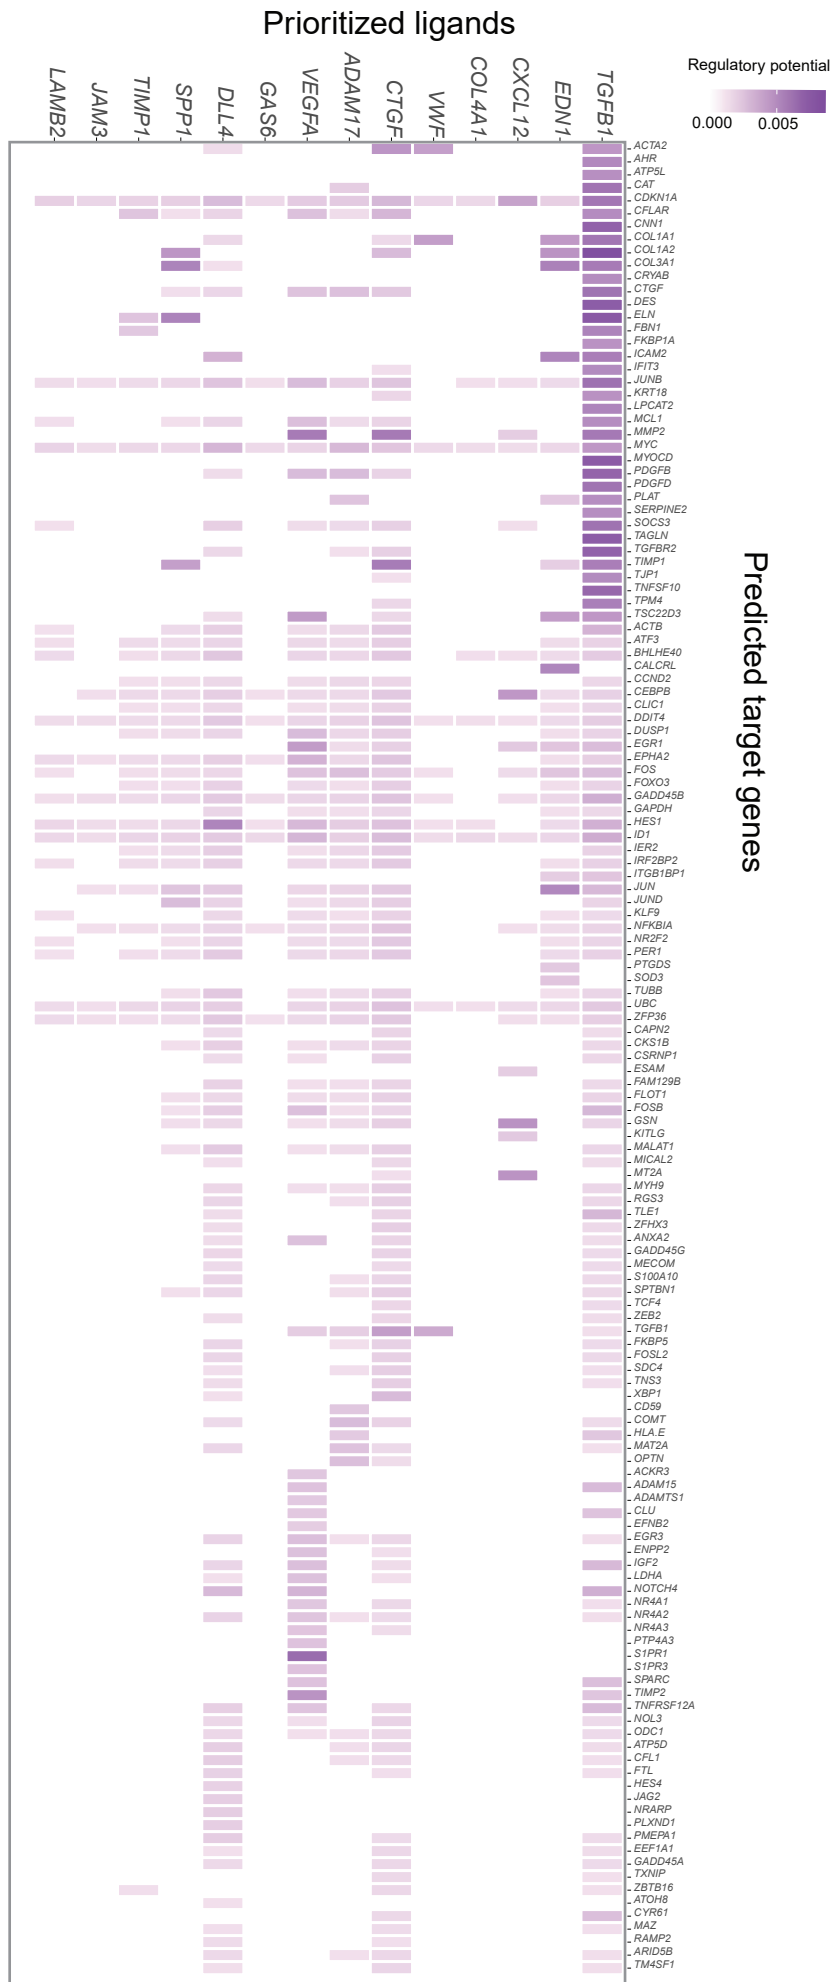

Supplement: NIHMS1893028-supplement-Supplementary_materials.pdf [file NIHMS1893028-supplement-Supplementary_materials.pdf]
